# Supplementary material for: Slowed aging during reproductive dormancy is reflected in genome-wide transcriptome changes in Drosophila melanogaster
Source: PubMed Central journal article supplement (PMC4711038; doi:10.1186/s12864-016-2383-1), 2016-01-13
Supplement: 12864_2016_2383_MOESM4_ESM.pdf [file 12864_2016_2383_MOESM4_ESM.pdf]

**A - GSEA of KEGG (Significant enrichment for mostly upregulated genes)**

| KEGG ID  | Name                                            | gDET | gALL | gSIG.Q | q (hyperG_Up) |
|----------|-------------------------------------------------|------|------|--------|---------------|
| dme01100 | Metabolic pathways                              | 635  | 940  | 551    | 1.41E-20      |
| dme00500 | Starch and sucrose metabolism                   | 39   | 57   | 37     | 6.06E-10      |
| dme00982 | Drug metabolism - cytochrome P450               | 44   | 59   | 38     | 1.72E-08      |
| dme00980 | Metabolism of xenobiotics by cytochrome P450    | 43   | 58   | 37     | 3.42E-08      |
| dme00052 | Galactose metabolism                            | 22   | 29   | 21     | 2.10E-06      |
| dme00903 | Limonene and pinene degradation                 | 46   | 68   | 41     | 4.58E-06      |
| dme00983 | Drug metabolism - other enzymes                 | 41   | 57   | 34     | 4.51E-05      |
| dme00040 | Pentose and glucuronate interconversions        | 28   | 40   | 25     | 6.90E-05      |
| dme00830 | Retinol metabolism                              | 19   | 29   | 18     | 0.000259      |
| dme00260 | Glycine, serine and threonine metabolism        | 21   | 27   | 18     | 0.000306      |
| dme00053 | Ascorbate and aldarate metabolism               | 18   | 29   | 16     | 0.000501      |
| dme00480 | Glutathione metabolism                          | 42   | 60   | 35     | 0.000501      |
| dme00600 | Sphingolipid metabolism                         | 20   | 25   | 18     | 0.00157       |
| dme00520 | Amino sugar and nucleotide sugar metabolism     | 32   | 46   | 26     | 0.00241       |
| dme04146 | Peroxisome                                      | 51   | 63   | 41     | 0.00627       |
| dme00360 | Phenylalanine metabolism                        | 9    | 10   | 9      | 0.00837       |
| dme04512 | ECM-receptor interaction                        | 9    | 11   | 7      | 0.00837       |
| dme00561 | Glycerolipid metabolism                         | 29   | 44   | 26     | 0.00929       |
| dme04142 | Lysosome                                        | 55   | 87   | 47     | 0.0102        |
| dme00250 | Alanine, aspartate and glutamate metabolism     | 23   | 29   | 20     | 0.0189        |
| dme00604 | Glycosphingolipid biosynthesis - ganglio series | 6    | 6    | 6      | 0.024         |
| dme00350 | Tyrosine metabolism                             | 14   | 19   | 14     | 0.0256        |
| dme00565 | Ether lipid metabolism                          | 18   | 23   | 16     | 0.0288        |
| dme01040 | Biosynthesis of unsaturated fatty acids         | 15   | 16   | 14     | 0.0327        |
| dme00010 | Glycolysis / Gluconeogenesis                    | 27   | 49   | 26     | 0.033         |
| dme00564 | Glycerophospholipid metabolism                  | 41   | 56   | 15     | 0.0383        |
| dme00030 | Pentose phosphate pathway                       | 16   | 22   | 35     | 0.0383        |
| dme00514 | Other types of O-glycan biosynthesis            | 21   | 34   | 19     | 0.042         |
| dme00340 | Histidine metabolism                            | 7    | 7    | 6      | 0.0468        |
| dme04711 | Circadian rhythm - fly                          | 6    | 7    | 6      | 0.0468        |

**B - GSEA of KEGG (Significant enrichment for mostly downregulated genes)**

| KEGG ID  | Name                                                  | gDET | gALL | gSIG.Q | q (hyperG_Down) |
|----------|-------------------------------------------------------|------|------|--------|-----------------|
| dme03040 | Spliceosome                                           | 90   | 116  | 86     | 1.94E-14        |
| dme03013 | RNA transport                                         | 94   | 125  | 91     | 7.47E-14        |
| dme03018 | RNA degradation                                       | 45   | 51   | 41     | 1.60E-08        |
| dme03030 | DNA replication                                       | 29   | 34   | 29     | 1.88E-07        |
| dme03010 | Ribosome                                              | 42   | 92   | 41     | 6.99E-07        |
| dme03020 | RNA polymerase                                        | 22   | 27   | 50     | 6.99E-07        |
| dme03008 | Ribosome biogenesis in eukaryotes                     | 53   | 84   | 22     | 6.99E-07        |
| dme03420 | Nucleotide excision repair                            | 27   | 37   | 27     | 3.15E-06        |
| dme00970 | Aminoacyl-tRNA biosynthesis                           | 37   | 46   | 33     | 6.01E-06        |
| dme00240 | Pyrimidine metabolism                                 | 64   | 80   | 59     | 0.000826        |
| dme03430 | Mismatch repair                                       | 15   | 19   | 15     | 0.00137         |
| dme03022 | Basal transcription factors                           | 25   | 30   | 24     | 0.00173         |
| dme04914 | <i>Progesterone-mediated oocyte maturation</i>        | 35   | 44   | 33     | 0.0086          |
| dme03440 | Homologous recombination                              | 14   | 18   | 13     | 0.0178          |
| dme03050 | Proteasome                                            | 33   | 50   | 32     | 0.0278          |
| dme03015 | mRNA surveillance pathway                             | 46   | 59   | 63     | 0.0348          |
| dme04120 | Ubiquitin mediated proteolysis                        | 72   | 98   | 40     | 0.0348          |
| dme00563 | Glycosylphosphatidylinositol(GPI)-anchor biosynthesis | 15   | 20   | 14     | 0.0355          |

gDET genes detected on array

gALL genes defined in pathway

gSIG\_Q significantly expressed genes in our study,  $|\log FC| > 0.4$ ,  $q < 0.05$
