# Supplementary material for: Slowed aging during reproductive dormancy is reflected in genome-wide transcriptome changes in Drosophila melanogaster
Source: PubMed Central journal article supplement (PMC4711038; doi:10.1186/s12864-016-2383-1), 2016-01-13
Supplement: 12864_2016_2383_MOESM5_ESM.pdf [file 12864_2016_2383_MOESM5_ESM.pdf]

| KEGG ID         | TITLE                                          | gDET | gALL | gSIG_Q | pG_Q    | Status_Q  | Description                                                                                                                |
|-----------------|------------------------------------------------|------|------|--------|---------|-----------|----------------------------------------------------------------------------------------------------------------------------|
| <b>dme04914</b> | <i>Progesterone-mediated oocyte maturation</i> | 41   | 41   | 25     | 0.00236 | Inhibited | Covers part of insulin signaling and MAPK signaling pathway.                                                               |
| <b>dme03460</b> | <i>Fanconi anemia pathway</i>                  | 26   | NA   | 17     | 0.00267 | Activated | The Fanconi anemia pathway is required for the efficient repair of damaged DNA, especially interstrand cross-links (ICLs). |
| <b>dme04512</b> | <b>ECM-receptor interaction</b>                | 10   | 10   | 7      | 0.0269  | Activated | ECM (Extracellular matrix) receptor interaction                                                                            |
| <b>dme04711</b> | <b>Circadian rhythm - fly</b>                  | 8    | 10   | 6      | 0.0271  | Inhibited |                                                                                                                            |

gDET genes detected on array  
gALL genes defined in pathway  
gSIG\_Q significantly expressed genes in our study,  $|\log FC| > 0.1$ ,  $q < 0.05$

NA not allowed
