# Supplementary material for: Slowed aging during reproductive dormancy is reflected in genome-wide transcriptome changes in Drosophila melanogaster
Source: PubMed Central journal article supplement (PMC4711038; doi:10.1186/s12864-016-2383-1), 2016-01-13
Supplement: 12864_2016_2383_MOESM6_ESM.pdf [file 12864_2016_2383_MOESM6_ESM.pdf]

**Supplementary Material Tables 1 – 7** Gene acronyms, full names and functions in signal pathways (to accompany Figures 4, 5, 7, 9 and S8 Fig.).

**Table 1** Insulin/IGF signaling (IIS) pathway components and pathway regulators in *D. melanogaster*

| Acronym                            | Gene name                                             | CG number | Function/description of gene product                                                                                                                              | Reference |
|------------------------------------|-------------------------------------------------------|-----------|-------------------------------------------------------------------------------------------------------------------------------------------------------------------|-----------|
| <i>dilp2</i>                       | <i>Drosophila insulin-like peptide 2</i>              | CG8167    | <i>dilp2</i> is expressed in a set of median neurosecretory cells (mNSC), known as insulin-producing cells (IPCs); regulates growth, metabolism, stress and aging | [1-3]     |
| <i>dilp1</i>                       | <i>Drosophila insulin-like peptide 1</i>              | CG14173   | <i>dilp1</i> transcripts are detected in larval-pupal IPCs; expression and function in adult are unknown                                                          | [4,5]     |
| <i>dilp4</i>                       | <i>Drosophila insulin-like peptide 1</i>              | CG6736    | <i>dilp4</i> expression is not detected in adult flies; functions are unknown                                                                                     | [1,5]     |
| <i>dilp3</i>                       | <i>Drosophila insulin-like peptide 3</i>              | CG14167   | <i>dilp3</i> is co-expressed with <i>dilp2</i> and <i>dilp5</i> in IPCs and in the muscle cells of the adult midgut                                               | [1,4,6]   |
| <i>dilp5</i>                       | <i>Drosophila insulin-like peptide 5</i>              | CG33273   | <i>dilp5</i> is expressed in IPCs and in follicle cells of the ovary as well as principal cells of the renal tubules                                              | [1,4,7]   |
| <i>dilp6</i>                       | <i>Drosophila insulin-like peptide 6</i>              | CG14049   | <i>dilp6</i> is expressed in adipose cells of the fat body                                                                                                        | [8,9]     |
| <i>dilp7</i>                       | <i>Drosophila insulin-like peptide 7</i>              | CG13317   | <i>dilp7</i> is expressed in about 20 neurons of the abdominal neuromeres; may function as <i>Drosophila</i> relaxin                                              | [1,10,11] |
| <i>dilp8</i>                       | <i>Drosophila insulin-like peptide 8</i>              | CG14059   | <i>dilp8</i> is expressed in the imaginal discs of larvae; in adult <i>dilp8</i> expression is abundant in ovaries                                                | [12,13]   |
| <i>InR</i>                         | <i>Insulin-like receptor</i>                          | CG18402   | Tyrosine-protein kinase with insulin-activated receptor activity; receptor of IIS signaling pathway                                                               | [14,15]   |
| <i>Chico</i><br>( <i>IRS</i> )     | <i>Chico</i><br>( <i>Insulin receptor substrate</i> ) | CG5686    | Insulin receptor substrate                                                                                                                                        | [16]      |
| <i>Lnk</i>                         | <i>Lnk</i>                                            | CG17367   | Insulin receptor adaptor protein                                                                                                                                  | [17,18]   |
| <i>Dp110</i><br>( <i>PI3K92E</i> ) | <i>Dp110</i><br>( <i>PI3K92E</i> )                    | CG4141    | Catalytic subunit of phosphatidylinositol 3-kinase (PI3K), a main upstream kinase in IIS                                                                          | [19,20]   |
| <i>Dp60</i><br>( <i>PI3K21B</i> )  | <i>Dp60</i><br>( <i>PI3K21B</i> )                     | CG2699    | Adaptive subunit of phosphatidylinositol 3-kinase (PI3K)                                                                                                          | [21]      |
| <i>step</i>                        | <i>steppke</i>                                        | CG11628   | PI3K upstream factor Steppke                                                                                                                                      | [22]      |

|                                 |                                                                          |         |                                                                                                                                                                                                                               |         |
|---------------------------------|--------------------------------------------------------------------------|---------|-------------------------------------------------------------------------------------------------------------------------------------------------------------------------------------------------------------------------------|---------|
| <i>Akt1</i><br>(PKB)            | <i>Akt1</i><br>(Protein kinase B)                                        | CG4006  | AKT, also known as protein kinase B, is a main downstream kinase in IIS, phosphorylates the transcription factor FOXO                                                                                                         | [15]    |
| <i>Pdk1</i>                     | <i>Phospho-inositide-dependent kinase 1</i>                              | CG1210  | PDK-1 is a central mediator of the signaling between PI3K and various intracellular serine/ threonine kinases including Akt (PKB)                                                                                             | [23]    |
| <i>melt</i>                     | <i>melted</i>                                                            | CG8624  | Melted modulates IIS pathway in <i>Drosophila</i> interacting with both Tsc1 and FOXO and can recruit these proteins to the cell membrane                                                                                     | [24]    |
| <i>foxo</i>                     | <i>forkhead box, sub-group O</i>                                         | CG3143  | FOXO is a key component of the insulin signaling cascade, which is phosphorylated by dAkt, leading to cytoplasmic retention and inhibition of its transcriptional activity                                                    | [25]    |
| <i>sgg / GSK3</i>               | <i>shaggy/ Glycogen Synthase Kinase 3</i>                                | CG2621  | Shaggy is a <i>Drosophila</i> orthologue of glycogen synthase kinase-3; which regulates glycogen synthesis by inhibiting glycogen synthase                                                                                    | [26]    |
| <i>GlyS (GS)</i>                | <i>Glycogen synthase</i>                                                 | CG6904  | Glycogen synthase is the main enzyme involved in converting glucose to glycogen                                                                                                                                               | [27]    |
| <i>Pepck</i>                    | <i>Phosphoenol-pyruvate carboxykinase</i>                                | CG17725 | PEPCK is a key enzyme of both gluconeogenesis and glycerogenesis                                                                                                                                                              | [28,29] |
| <i>bmm</i><br>( <i>Atgl</i> )   | <i>Brummer</i><br>( <i>adipocyte triglyceride lipase</i> )               | CG5295  | Triacylglyceride lipase Brummer, a homolog of human adipocyte triglyceride lipase (ATGL)                                                                                                                                      | [30]    |
| <i>Pdk</i>                      | <i>Pyruvate dehydrogenase kinase</i>                                     | CG8808  | PDK is responsible for an inactivation of pyruvate dehydrogenase complex and decrease of Krebs cycle turnover with a re-direction of pyruvate into anaerobic oxidation                                                        | [31]    |
| <i>Cat</i>                      | <i>Catalase</i>                                                          | CG6871  | Catalase is one of the key antioxidants enzymes; <i>Cat</i> expression is under FOXO control                                                                                                                                  | [32,33] |
| <i>Sod2</i>                     | <i>Superoxide dismutase 2</i>                                            | CG8905  | SOD2 is a manganese/iron superoxide dismutase, participating in antioxidant defence; <i>Sod2</i> expression is under FOXO control                                                                                             | [32,33] |
| <i>Thor</i><br>( <i>4E-BP</i> ) | <i>Thor</i><br>( <i>eukaryotic initiation factor 4 binding protein</i> ) | CG8846  | <i>Thor</i> encodes eukaryotic initiation factor 4 binding protein (4E-BP), an inhibitor of translation and is a FOXO transcriptional target, However, 4E-BP is also known to be under a control of the TOR-signaling pathway | [34,35] |

|              |                                    |                                  |                                                                                                                                                                                     |         |
|--------------|------------------------------------|----------------------------------|-------------------------------------------------------------------------------------------------------------------------------------------------------------------------------------|---------|
| <i>Sik3</i>  | Salt-inducible kinase<br>3         | CG42856<br>(CG15072,<br>CG18604) | SIK3 is a member of the AMPK family of Ser/Thr kinases, which play a critical role in energy balance. Being activated by AKT, SIK3 promotes lipid storage by blocking FOXO activity | [29]    |
| <i>HDAC4</i> | <i>HDAC4</i>                       | CG1770                           | Gene encodes histone deacetylase class II, which regulates transcriptional activity of certain transcriptional factors, including FOXO                                              | [29,36] |
| <i>HNF4</i>  | <i>Hepatocyte nuclear factor 4</i> | CG9310                           | HNF4 is a nuclear receptor, which in association with the transcription factor FOXO activates expression of gluconeogenic genes                                                     | [37-39] |

**Table 2** TOR signaling pathway components in *D. melanogaster*

| Acronym       | Gene name                                     | CG number | Function/Description of the gene product                                                                                                                                                                  | Reference  |
|---------------|-----------------------------------------------|-----------|-----------------------------------------------------------------------------------------------------------------------------------------------------------------------------------------------------------|------------|
| <i>slif</i>   | <i>slimfast</i>                               | CG11128   | cationic amino acid transporter (CAT)                                                                                                                                                                     | [40]       |
| <i>path</i>   | <i>pathetic</i>                               | CG3424    | proton-assisted amino acid transporter (PAT)                                                                                                                                                              | [41]       |
| <i>mind</i>   | <i>minidisks</i>                              | CG3297    | heterodimeric amino acid transporter (HAT)                                                                                                                                                                | [42]       |
| <i>raptor</i> | <i>raptor</i>                                 | CG4320    | A rapamycin-sensitive TOR companion within TORC1 complex                                                                                                                                                  | (see [43]) |
| <i>Tor</i>    | <i>Target of rapamycin</i>                    | CG5092    | TOR kinase, a main component of TORC1 and TORC2 complexes                                                                                                                                                 | (see [43]) |
| <i>rictor</i> | <i>rapamycin-insensitive companion of Tor</i> | CG8002    | A rapamycin-insensitive companion of TOR in TORC2 complex                                                                                                                                                 | (see [43]) |
| <i>S6k</i>    | <i>RPS6-p70-protein kinase</i>                | CG10539   | Ribosomal protein S6 kinase; a downstream target of TOR                                                                                                                                                   | (see [43]) |
| <i>Thor</i>   | <i>Thor/4E-BP</i>                             | CG8846    | Eukaryotic translation initiation factor 4E binding; a downstream target of TOR                                                                                                                           | (see [43]) |
| <i>RagA-B</i> | <i>Ras-related GTP binding A/B</i>            | CG11968   | Rag GTPases are activators of TORC1 in response to amino acid signals                                                                                                                                     | [44,45]    |
| <i>RagC-D</i> | <i>Ras-related GTP binding C/D</i>            | CG8707    | Rag GTPases are activators of TORC1 in response to amino acid signals                                                                                                                                     | [44,45]    |
| <i>Tsc1</i>   | <i>Tsc1/tuberous sclerosis complex 1</i>      | CG6147    | A part of tuberous sclerosis complex (TSC), consisting of two subunits in <i>Drosophila</i> TSC1 and gigas (TSC2)                                                                                         | [46]       |
| <i>gig</i>    | <i>gigas (Tsc2)</i>                           | CG6975    | A part of tuberous sclerosis complex (TSC) with an ability of TSC2 to act as a GTPase-activating protein to inactivate GTPase Rheb (Ras homologue enriched in brain), an ultimate activator of TOR kinase | [46]       |
| <i>Rheb</i>   | <i>Ras homologue enriched in brain</i>        | CG1081    | Small GTPase Rheb is a direct target of Tsc2 GAP activity                                                                                                                                                 | [47]       |

|                                                    |                                                                            |                     |                                                                                                                                                                                                                                                                                     |                  |
|----------------------------------------------------|----------------------------------------------------------------------------|---------------------|-------------------------------------------------------------------------------------------------------------------------------------------------------------------------------------------------------------------------------------------------------------------------------------|------------------|
| <i>AMPK<math>\alpha</math></i><br>( <i>snf1a</i> ) | <i>AMP-activated protein kinase <math>\alpha</math> subunit (snf1a)</i>    | CG3051              | AMPK is a low ATP:ADP ratio sensor, which can directly phosphorylate TSC2, enhancing its GAP activity and, as result, leading to TORC1 inhibition                                                                                                                                   | [48-50]          |
| <i>Sesn</i>                                        | <i>Sestrin</i>                                                             | CG11299             | Sestrin transcription in <i>Drosophila</i> is under FOXO control and leads to AMPK activation and in turn an enhancement of Tsc1/Tsc2 inhibition of TORC1                                                                                                                           | [51]             |
| <i>eIF-4E</i>                                      | <i>Eukaryotic initiation factor 4E</i>                                     | CG4035              | Translation initiation factor that interacts with <i>Drosophila</i> eIF4E-binding protein (4E-BP)                                                                                                                                                                                   | [52]             |
| <i>Tif-IA</i>                                      | <i>Tif-IA</i>                                                              | CG3278<br>(CG5951)  | TIF-IA protein is a Pol I transcription initiation factor                                                                                                                                                                                                                           | Reviewed [53]    |
| <i>Atg1</i>                                        | <i>Autophagy-related 1</i>                                                 | CG10967             | Atg 1 is a main autophagy gene, whose kinase activity is known to be inhibited by TOR                                                                                                                                                                                               | Reviewed in [54] |
| <i>sima</i><br>( <i>HIF-1<math>\alpha</math></i> ) | <i>similar</i><br>( <i>Hypoxia inducible factor 1<math>\alpha</math></i> ) | CG45051<br>(CG7951) | One of the main hypoxia-inducible transcription factors, which represent <i>Drosophila</i> HIF1-a                                                                                                                                                                                   | [55]             |
| <i>tgo</i><br>( <i>Arnt</i> ,<br><i>HIF-1b</i> )   | <i>tango</i><br>( <i>Arnt</i> , <i>Hypoxia inducible factor 1b</i> )       | CG11987             | One of the main hypoxia-inducible transcription factors, which represent <i>Drosophila</i> HIF1-b                                                                                                                                                                                   | [55]             |
| <i>scyl</i>                                        | <i>scylla</i>                                                              | CG7590              | One of the hypoxia induced genes, homologue of mammalian REDD1                                                                                                                                                                                                                      | [56]             |
| <i>chrb</i>                                        | <i>charybde</i>                                                            | CG7533              | One of the hypoxia induced genes, homologue of mammalian REDD2                                                                                                                                                                                                                      | [56]             |
| <i>Dm</i><br>( <i>Myc</i> )                        | <i>diminutive</i><br>( <i>Myc</i> )                                        | CG10798             | Diminutive is a <i>Drosophila</i> Myc homologue; a transcriptional factor, whose expression and activity is under FOXO and TORC1 control, respectively, and involved in the transcriptional regulation of ribosome synthesis genes such as Pol I transcription factor <i>Tif-IA</i> | [57]             |
| <i>saw</i> /<br><i>CG3071</i>                      | <i>saw/CG3071</i>                                                          | CG3071              | An ortholog of human SAW; is under TOR-dependent transcriptional control and encodes a protein with conserved functional roles in growth (positive growth regulator)                                                                                                                | [58]             |
| <i>ash2</i>                                        | absent, small, or homeotic discs 2                                         | CG6677              | An ortholog of human ASHL; is under TOR-dependent transcriptional control and encodes a protein, that is a negative growth regulator                                                                                                                                                | [58]             |
| <i>pit</i>                                         | <i>pitchoune</i>                                                           | CG6375              | Pitchoune is a helicase, required for cell growth and proliferation; a potential target of d-Myc                                                                                                                                                                                    | [59]             |
| <i>ppan</i>                                        | <i>peter pan</i>                                                           | CG5786              | Required for mitotic proliferation, growth and some aspects of differentiation                                                                                                                                                                                                      | [60]             |

|                                 |                                                    |        |                                                          |      |
|---------------------------------|----------------------------------------------------|--------|----------------------------------------------------------|------|
| <i>Nop60B</i><br>( <i>mnf</i> ) | <i>Nucleolar protein at 60B</i> ( <i>minifly</i> ) | CG3333 | Gene with pleiotropic effects on viability and fertility | [61] |
|---------------------------------|----------------------------------------------------|--------|----------------------------------------------------------|------|

**Table 3** Proposed AKH signalling pathway components in *D. melanogaster*, partly based on experimental findings from other insects

| Acronym                        | Gene name                                                                                  | CG number            | Function/Description of the gene product                                                                                                                                                                                                                                                                                                                                | Reference           |
|--------------------------------|--------------------------------------------------------------------------------------------|----------------------|-------------------------------------------------------------------------------------------------------------------------------------------------------------------------------------------------------------------------------------------------------------------------------------------------------------------------------------------------------------------------|---------------------|
| <i>Akh</i>                     | <i>Adipokinetic hormone</i>                                                                | CG1171               | AKH is produced by corpora cardiaca glandular cells; functional homolog of glucagon and regulates glucose homeostasis                                                                                                                                                                                                                                                   | [62,63]             |
| <i>AkhR</i><br>( <i>GRHR</i> ) | <i>Adipokinetic hormone receptor</i><br>( <i>Gonadotropin releasing hormone receptor</i> ) | CG11325              | AKHR belongs to the G protein-coupled proteins, structurally related to receptors of the vertebrate gonadotropin releasing hormone                                                                                                                                                                                                                                      | [64]                |
| <i>Plc21C</i>                  | <i>Phospholipase C at 21C</i>                                                              | CG4574               | Activation of PLC21C is triggered by binding of AKH to AKHR, initiating a phospholipase-C/proteinkinase-C signalling cascade, when enhanced phospholipase C cleaves phosphatidylinositol (3,4,5)-trisphosphate (PIP <sub>3</sub> ) into diacylglycerol (DAG) and inositol (1,4,5) phosphate (IP <sub>3</sub> ), which, in turn, transduces a signal to protein kinase C | [65-67]             |
| <i>Pkcδ</i>                    | <i>Protein kinase C delta</i>                                                              | CG42349<br>(CG10524) | Protein kinase C is activated by DAG as result of phospholipase C activation                                                                                                                                                                                                                                                                                            | [65,66]             |
| Cam                            | <i>Calmodulin</i>                                                                          | CG8472               | Calmodulin is a calcium binding signal molecule that assists phospholipase-C/proteinkinase-C signalling cascade                                                                                                                                                                                                                                                         | [65]                |
| <i>PhK<math>\gamma</math></i>  | <i>Phosphorylase kinase gamma</i>                                                          | CG1830               | <i>Drosophila</i> phosphorylase kinase gamma is a putative homologue of the vertebrate phosphorylase kinase catalytic gamma-subunit, which is a target of phospholipase-C/proteinkinase-C signalling cascade and a direct activator of glycogen phosphorylase                                                                                                           | reviewed in [66,68] |
| <i>GlyP</i><br>( <i>GP</i> )   | <i>Glycogen phosphorylase</i>                                                              | CG7254               | Glycogen breakdown enzyme                                                                                                                                                                                                                                                                                                                                               | [69]                |
| Ac13E                          | Adenylyl cyclase 35C                                                                       | CG9210               | Activation of adenylyl cyclase leads to elevation of cAMP, which activates protein kinase A (PKA)                                                                                                                                                                                                                                                                       | Reviewed in [66,67] |
| <i>Pka/Pka-C1</i>              | <i>Protein kinase A/cAMP-dependent protein kinase 1</i>                                    | CG4379               | PKA with assistance of calcium ions stimulates Plin1 and, in turn, hormone-sensitive lipase (HSL). In <i>Manduca sexta</i> binding of AKH by its receptor transduces a signal via cAMP to PKA, which phosphorylates Plin1, but the AKH/AKHR-mediated PKA activation is only                                                                                             | [70,71]             |

|                                  |                                                   |         |                                                                                                                                                                                                                                                                                                                                                                                                                                                                                                                                                                                                  |            |
|----------------------------------|---------------------------------------------------|---------|--------------------------------------------------------------------------------------------------------------------------------------------------------------------------------------------------------------------------------------------------------------------------------------------------------------------------------------------------------------------------------------------------------------------------------------------------------------------------------------------------------------------------------------------------------------------------------------------------|------------|
|                                  |                                                   |         | partly confirmed for <i>Drosophila</i>                                                                                                                                                                                                                                                                                                                                                                                                                                                                                                                                                           |            |
| <i>Lsd-1</i><br>( <i>plin1</i> ) | Lipid storage droplet-1<br>( <i>Perilipin 1</i> ) | CG10374 | Perilipin 1 is a <i>Drosophila</i> lipid droplet surface protein that has opposite roles under normal and starvation conditions, preventing lipases from accessing lipid droplets under basal lipolysis, but promoting lipase access to lipids under starvation. Thus, under energy deficit Perilipin1 is phosphorylated by PKA in response to hormonal signals. Phosphorylated Perilipin1 facilitates maximal lipolysis by recruiting hormone-sensitive lipase (HSL). Plin1 is found to be downstream effector for AKH signalling. The mechanism is conserved for mammals and <i>Drosophila</i> | [70,72-74] |
| <i>Hsl</i>                       | Hormone-sensitive lipase                          | CG11055 | Hormone-sensitive lipase is the sole homolog of mammalian HSL in <i>Drosophila</i>                                                                                                                                                                                                                                                                                                                                                                                                                                                                                                               | [72,75]    |
| <i>tobi</i>                      | target of brain insulin                           | CG11909 | <i>tobi</i> expression was postulated to be under AKH signaling control through an unknown X transcription factor; <i>tobi</i> encodes alpha-1,4-glucosidase                                                                                                                                                                                                                                                                                                                                                                                                                                     | [76]       |

**Table 4** JAK-STAT signaling pathway components in *D. melanogaster*

| Acronym        | Gene name                                                       | CG number            | Function/Description of the gene product                                                                                                                                                                                                                                              | Reference |
|----------------|-----------------------------------------------------------------|----------------------|---------------------------------------------------------------------------------------------------------------------------------------------------------------------------------------------------------------------------------------------------------------------------------------|-----------|
| <i>dome</i>    | <i>domeless</i>                                                 | CG14226              | Encodes cytokine-like receptor Dome, which expression is under Stat92E control                                                                                                                                                                                                        | [77-80]   |
| <i>hop</i>     | <i>hopscotch</i>                                                | CG1594               | Encodes <i>Drosophila</i> Janus kinase (JAK)                                                                                                                                                                                                                                          | [77-79]   |
| <i>Stat92E</i> | Signal-transducer and activator of transcription protein at 92E | CG4257               | Transcriptional factor Stat92E                                                                                                                                                                                                                                                        | [77-79]   |
| <i>RanBPM</i>  | Ran-binding protein M                                           | CG42236<br>(CG11763) | The <i>Drosophila</i> homologue of <i>RanBP10</i> known to control signal-dependent nuclear translocation of Stat92E                                                                                                                                                                  | [81]      |
| <i>RanBP3</i>  | Ran binding protein 3                                           | CG10225              | Control of the signal-dependent nuclear translocation of Stat92E                                                                                                                                                                                                                      | [81]      |
| <i>Socs36E</i> | Suppressor of cytokine signaling at 36E                         | CG15154              | The strongest negative effector of JAK/STAT signaling among three Socs. Involved in both lysosomal degradation of Dome and preventing its phosphorylation by hop; participates in a negative feedback loop: <i>Socs36E</i> expression is transcriptionally activated by JAK signaling | [82-85]   |
| <i>Socs16D</i> | Suppressor of cytokine signaling at                             | CG8146               | <i>Socs16D</i> is a negative regulator of JAK-STAT signalling                                                                                                                                                                                                                         | [82,83]   |

|                    |                                                     |                                 |                                                                                                                                                                               |                     |
|--------------------|-----------------------------------------------------|---------------------------------|-------------------------------------------------------------------------------------------------------------------------------------------------------------------------------|---------------------|
|                    | <i>16D</i>                                          |                                 |                                                                                                                                                                               |                     |
| <i>Socs44A</i>     | <i>Suppressor of cytokine signaling at 44A</i>      | CG2160                          | Socs44E is a negative regulator of JAK-STAT signalling through hop                                                                                                            | [82,83]             |
| <i>Ptp61F</i>      | <i>Protein tyrosine phosphatase 61F</i>             | CG9181                          | Ptp61F is a transcriptional target of Stat92E, which also functions via a negative feedback and deactivates hop                                                               | [78,81]             |
| <i>Su(var)2-10</i> | <i>Suppressor of variegation 2-10 (zimp, dPIAS)</i> | CG8068                          | The <i>Drosophila</i> PIAS (protein inhibitors of activated STATs) homolog, responsible for binding and blocking of Stat92E dimers                                            | [86]                |
| <i>os/upd1</i>     | <i>outstretched (unpaired 1)</i>                    | CG5993                          | Receptor Dome ligand                                                                                                                                                          | [87]                |
| <i>upd2</i>        | <i>unpaired 2</i>                                   | CG5988                          | Receptor Dome ligand                                                                                                                                                          | [87]                |
| <i>upd3</i>        | <i>unpaired 3</i>                                   | CG33542<br>(CG5963,<br>CG15062) | Receptor Dome ligand                                                                                                                                                          | [87]                |
| <i>Cnot4</i>       | <i>Cnot 4 homologue</i>                             | CG31716<br>(CG5251)             | Transcription regulation complex subunit, needed for proper Stat92E DNA binding                                                                                               | [88]                |
| <i>BRWD3</i>       | <i>bromo-domain-containing protein</i>              | CG31132<br>(CG6400)             | A positive regulator with an elusive function                                                                                                                                 | [79,89]             |
| <i>ken</i>         | <i>ken and barbie (ok)</i>                          | CG5575                          | Stat92E transcriptional antagonist                                                                                                                                            | [79]                |
| <i>Diedel</i>      | <i>Diedel</i>                                       | CG11501                         | A suggested negative regulator of JAK/STAT signalling with unclear molecular mechanism                                                                                        | [89,90]             |
| <i>et</i>          | <i>eye transformer (latran)</i>                     | CG14225                         | A negative regulator of JAK/STAT signaling                                                                                                                                    | [91]                |
| <i>dally</i>       | <i>division abnormally delayed (gem)</i>            | CG4974                          | A glypican involved in Upd distribution, responsible in activating of JAK/STAT pathway                                                                                        | [92]                |
| <i>dlp</i>         | <i>dally-like protein</i>                           | CG32146                         | An activator of JAK/STAT pathway by participating in Upd distribution                                                                                                         | [92]                |
| <i>TotA</i>        | <i>Turandot A</i>                                   | CG31509                         | Stress-inducible humoral factor, known to play an important role in stress tolerance and immune response                                                                      | [87,93]             |
| <i>Nop56</i>       | <i>Nop56</i>                                        | CG13849                         | A JAK/STAT target gene with Stat92E binding sites; a growth regulator                                                                                                         | Reviewed in [94]    |
| <i>Jheh2</i>       | <i>Juvenile hormone epoxide hydrolase</i>           | CG15102                         | A JAK/STAT target gene with Stat92E binding sites; JHEH is mainly involved in xenobiotic biotransformation, not just in juvenile hormone metabolism in <i>D. melanogaster</i> | Reviewed in [94,95] |
| <i>ftz-f1</i>      | <i>ftz transcription factor 1</i>                   | CG4059                          | A JAK/STAT target gene with Stat92E binding sites; zinc finger, nuclear hormone receptor-type                                                                                 | Reviewed in [94]    |
| <i>H</i>           | <i>Hairless</i>                                     | CG5460                          | A JAK/STAT target gene with Stat92E binding sites; negative regulator of Notch                                                                                                | Reviewed in [94]    |

|               |                                                    |                      |                                                                                                                                                                                           |                  |
|---------------|----------------------------------------------------|----------------------|-------------------------------------------------------------------------------------------------------------------------------------------------------------------------------------------|------------------|
|               |                                                    |                      | pathway                                                                                                                                                                                   |                  |
| <i>Tom</i>    | <i>Twin of m4 (barbu)</i>                          | CG5185               | A JAK/STAT target gene with Stat92E binding sites; negative regulator of Notch pathway                                                                                                    | Reviewed in [94] |
| <i>Paip2</i>  | <i>polyA-binding protein interacting protein 2</i> | CG12358              | A JAK/STAT target gene with Stat92E binding sites; negative regulator of translation                                                                                                      | Reviewed in [94] |
| <i>Zfh-1</i>  | <i>zinc finger homeodomain 1</i>                   | CG1322               | A JAK/STAT target gene with Stat92E binding sites; transcription factor that binds E box sequences and acts as an active transcriptional repressor                                        | [96,97]          |
| <i>eve</i>    | <i>even skipped</i>                                | CG2328               | A JAK/STAT target gene that functions in development                                                                                                                                      | [98]             |
| <i>chinmo</i> | <i>chronologically inappropriate morphogenesis</i> | CG31666<br>(CG17156) | A functional effector of the JAK/STAT pathway that regulates eye development, tumor formation, and stem cell self-renewal in <i>Drosophila</i>                                            | [99]             |
| <i>TotC</i>   | Turandot C                                         | CG31508              | Stress-inducible humoral factor, known to play an important role in stress tolerance and immune response                                                                                  | [93]             |
| <i>TotM</i>   | Turandot M                                         | CG14027              | Stress-inducible humoral factor, known to play an important role in stress tolerance and immune response                                                                                  | [93]             |
| <i>TotX</i>   | Turandot X                                         | CG31193              | Stress-inducible humoral factor, involved in response to heat and oxidative stress as well as bacterial infection                                                                         | [93]             |
| <i>vir-1</i>  | <i>virus-induced RNA-1</i>                         | CG31764              | A JAK/STAT readout gene, known to be required for antiviral protection                                                                                                                    | [100]            |
| <i>Tep2</i>   | <i>Thioester-containing protein 2</i>              | CG7052<br>(CG18589)  | Resembles the vertebrate complement factors and $\alpha$ -macroglobulin family of protease inhibitors, and is known to be expressed mainly in hemocytes under JAK/STAT signalling control | [77,101]         |
| <i>Tep3</i>   | <i>Thioester-containing protein 3</i>              | CG7068               | Resembles the vertebrate complement factors and $\alpha$ -macroglobulin family of protease inhibitors, and is known to be expressed mainly in hemocytes under JAK/STAT signalling control | [77,101]         |
| <i>Tep4</i>   | <i>Thioester-containing protein 4</i>              | CG10363              | Resembles the vertebrate complement factors and $\alpha$ -macroglobulin family of protease inhibitors, and is known to be expressed mainly in hemocytes under JAK/STAT signalling control | [77,101]         |



**Table 5** Toll signaling pathway in *D. melanogaster*

| Acronym          | Gene name                                       | CG number           | Function/Description of the gene product                                         | Reference |
|------------------|-------------------------------------------------|---------------------|----------------------------------------------------------------------------------|-----------|
| <i>PGRP-SA</i>   | <i>Peptidoglycan recognition protein SA</i>     | CG11709             | Pattern recognition receptor for Gram-positive bacteria, cooperates with GGBP1   | [74]      |
| <i>PGRP-SD</i>   | <i>Peptidoglycan recognition protein SD</i>     | CG7496              | Pattern recognition receptor for Gram-positive bacteria                          | [102]     |
| <i>GGBP1</i>     | <i>Gram-negative bacteria binding protein 1</i> | CG6895              | Pattern recognition receptor for Gram-positive bacteria, cooperates with PGRP-SA | [74]      |
| <i>GGBP3</i>     | <i>Gram-negative bacteria binding protein 3</i> | CG5008              | Pattern recognition receptor for fungal cell wall components                     | [95]      |
| <i>modSP</i>     | <i>modular serine protease</i>                  | CG31217             | Protease from protease cascade leading to processing spatzie                     | [84]      |
| <i>grass</i>     | <i>Gram-positive Specific Serine protease</i>   | CG5896              | Protease from activation cascade leading to processing spatzie                   | [103]     |
| <i>spheroide</i> | <i>spheroide</i>                                | CG9675              | Protease from activation cascade leading to processing spatzie                   | [69]      |
| <i>spirit</i>    | <i>spirit</i>                                   | CG2056              | Protease from activation cascade leading to processing spatzie                   | [69]      |
| <i>sphinx1/2</i> | <i>sphinx1/<br/>sphinx2</i>                     | CG32383/<br>CG32382 | Proteases from activation cascade leading to processing spatzie                  | [69]      |
| <i>nec</i>       | <i>necrotic</i>                                 | CG1857              | Serine proteinase inhibitor, inhibitor of persephone                             | [104]     |
| <i>psh</i>       | <i>persephone</i>                               | CG6367              | Serine protease activated by several virulence factors                           | [105]     |
| <i>SPE</i>       | <i>Spätzle-Processing Enzyme</i>                | CG16705             | Serine protease responsible for spätzle cleavage                                 | [106]     |
| <i>spz</i>       | <i>spätzle</i>                                  | CG6134              | Toll receptor ligand                                                             | [105]     |
| <i>Tl</i>        | <i>Toll</i>                                     | CG5490              | Toll receptor                                                                    | [105]     |
| <i>mop</i>       | <i>myopic</i>                                   | CG9311              | Endocytosis complex component                                                    | [107]     |
| <i>Myd88</i>     | <i>Myd88</i>                                    | CG2078              | Adaptor protein of Toll receptor, part of heterotrimeric DD complex              | [105]     |
| <i>tub</i>       | <i>tube</i>                                     | CG10520             | Adaptor protein of Toll receptor, part of heterotrimeric DD complex              | [105]     |
| <i>pll</i>       | <i>pelle</i>                                    | CG5974              | Adaptor protein of Toll receptor, part of heterotrimeric DD complex              | [105]     |
| <i>pli</i>       | <i>Pellino</i>                                  | CG5212              | Pelle/IRAK interacting protein                                                   | [108]     |
| <i>Gprk2</i>     | <i>G protein-coupled receptor kinase 2</i>      | CG17998             | Cactus interacting protein                                                       | [109]     |
| <i>cact</i>      | <i>cactus</i>                                   | CG5848              | I $\kappa$ B factor                                                              | [59]      |
| <i>Dif</i>       | <i>Dorsal-related</i>                           | CG6794              | NF- $\kappa$ B transcription factor                                              | [110]     |

|              |                                                   |         |                             |       |
|--------------|---------------------------------------------------|---------|-----------------------------|-------|
|              | <i>immunity factor</i>                            |         |                             |       |
| <i>dl</i>    | <i>dorsal</i>                                     | CG6667  | NF-κB transcription factor  | [105] |
| <i>Deaf1</i> | <i>Deformed epidermal autoregulatory factor-1</i> | CG8567  | Transcription factor        | [111] |
| <i>Drs</i>   | <i>Drosomycin</i>                                 | CG10810 | Antimicrobial protein (AMP) | [112] |
| <i>Drsl5</i> | <i>Drosomycin-like 5</i>                          | CG10812 | AMP-like protein            | [113] |
| <i>IM1</i>   | <i>Immune induced molecule 1</i>                  | CG18108 |                             | [113] |
| <i>IM2</i>   | <i>Immune induced molecule 2</i>                  | CG18106 |                             | [113] |

**Table 6** Torso/MAPK signaling pathway components in *D. melanogaster*

| Acronym     | Gene name                 | CG number | Function/Description of the gene product                                                                                                                                                                                                                                                                                    | Reference     |
|-------------|---------------------------|-----------|-----------------------------------------------------------------------------------------------------------------------------------------------------------------------------------------------------------------------------------------------------------------------------------------------------------------------------|---------------|
| <i>tsl</i>  | <i>torso-like</i>         | CG6705    | Torso-like is a <i>Drosophila</i> membrane attack complex/perforin-like protein. It binds the receptor tyrosine kinase Torso (Tor) and activates the Torso signaling cascade during terminal patterning of <i>Drosophila</i> embryo. A role of Tsl in control of body size and development, independent on Torso signaling. | [103,114,115] |
| <i>tor</i>  | <i>torso</i>              | CG1389    | The Torso receptor tyrosine kinase (RTK) is distributed throughout the membrane in the embryo and activated by its ligand, like torso-like. Upon activation, two neighboring Torso receptors dimerize and transphosphorylate each other, recruiting corkscrew and the adaptor molecule Drk.                                 | [116]         |
| <i>trk</i>  | <i>trunk</i>              | CG5619    | Trunk (expressed in the embryo) is a putative ligand of Torso receptor, responsible for the spatially restricted Tor activation. Trunk must be cleaved under control of Torso-like (Tsl) secretion at embryo pole in order to bind Tor. Torso-like independent cleavage of Trunk has also been found.                       | [117]         |
| <i>boss</i> | <i>bride of sevenless</i> | CG8285    | Boss is a G protein-coupled receptor (GPCR) that was first identified as a ligand for the Sevenless tyrosine kinase, which is involved in eye differentiation in <i>Drosophila</i> . Recently a role of Boss in glucose sensing and regulation of sugar and lipid metabolism was shown.                                     | [118,119]     |
| <i>sev</i>  | <i>bride of sevenless</i> | CG18085   | Sevenless is a receptor tyrosine kinase (RTK), initiating the signaling pathway responsible for                                                                                                                                                                                                                             | [120,121]     |

|                       |                                                          |         |                                                                                                                                                                                                                     |           |
|-----------------------|----------------------------------------------------------|---------|---------------------------------------------------------------------------------------------------------------------------------------------------------------------------------------------------------------------|-----------|
|                       |                                                          |         | differentiation of ommatidial cells during development.                                                                                                                                                             |           |
| <i>drk</i>            | <i>downstream of receptor kinase</i>                     | CG6033  | Drk is an adaptor molecule that couples receptor tyrosine kinase (RTK) to son-of-sevenless (Sos). The association of Drk, Sos and RTK allows Sos to interact with membrane-bound Ras1.                              | [122]     |
| <i>csw</i>            | <i>corkscrew</i>                                         | CG3954  | Corkscrew is a non-receptor protein tyrosine phosphatase, homologous to the mammalian SHP-2 protein.                                                                                                                | [123]     |
| <i>Sos</i>            | <i>Son of sevenless</i>                                  | CG7793  | Sos encodes a guanine-nucleotide exchange factor, which exchanges inactive GDP-Ras I for active GTP-Ras I.                                                                                                          | [124]     |
| <i>βggt-1</i>         | <i>β subunit of type I geranylgeranyl transferase</i>    | CG3469  | A factor involved in RAS posttranslational modification (prenylation); a positive regulator of MAPK signaling.                                                                                                      | [125,126] |
| <i>Fnta</i>           | <i>Farnesyl transferase α</i>                            | CG2976  | FNTA is <i>Drosophila</i> ortholog of the mammalian alpha farnesyltransferase subunit, an enzyme responsible for RAS farnesylation, which is required for Ras membrane localization and cell transforming activity. | [102,126] |
| <i>Hmgcr</i>          | <i>Hydroxymethyl-glutaryl-(HMG) Coenzyme A reductase</i> | CG10367 | HMGCR functions is required for farnesylation of RAS membrane-associated proteins.                                                                                                                                  | [126]     |
| <i>Ras85D (Ras1)</i>  | <i>Ras oncogene at 85D (Ras 1)</i>                       | CG9375  | Ras I associates with Raf1 serine/threonine kinase, recruiting it to the plasma membrane.                                                                                                                           | [127]     |
| <i>phl (Raf1)</i>     | <i>pole hole (Raf1)</i>                                  | CG2845  | Pole hole, a <i>Drosophila</i> Raf1 that may function as the first molecule in the MAPK cascade, phosphorylating and activating Dsor 1 ( <i>Drosophila</i> MEK).                                                    | [109,128] |
| <i>Dsor1 (MEK)</i>    | <i>Downstream of raf1</i>                                | CG15793 | Dsor (MEK) is MAPKK, which is phosphorylated by Raf1 (MAPKKK), in turn, phosphorylates and activates rolled/ERK (MAPK).                                                                                             | [111]     |
| <i>rl (ERK, MAPK)</i> | <i>rolled (Mitogen-activated protein kinase)</i>         | CG12559 | Rolled encodes a <i>Drosophila</i> MAPK – a central kinase in the MAPK signalling cascade, which phosphorylates a number of transcriptional factors and cytoplasmic targets.                                        | [129]     |
| <i>ksr</i>            | <i>kinase suppressor of ras</i>                          | CG2899  | <i>ksr</i> encodes a protein kinase, which is a general and evolutionarily conserved component of the RAS signaling pathway that acts between RAS and RAF.                                                          | [107]     |
| <i>cnk</i>            | <i>connector enhancer of ksr</i>                         | CG6556  | <i>cnk</i> encodes a protein containing several protein-protein interaction domains, suggesting                                                                                                                     | [106]     |

|                              |                                                          |                               |                                                                                                                                                                                                                                                      |           |
|------------------------------|----------------------------------------------------------|-------------------------------|------------------------------------------------------------------------------------------------------------------------------------------------------------------------------------------------------------------------------------------------------|-----------|
|                              |                                                          |                               | that it brings different signaling molecules together.                                                                                                                                                                                               |           |
| <i>Ave</i><br>( <i>HYP</i> ) | <i>Aveugle</i><br>( <i>Hyphen</i> )                      | CG30476                       | Hyphen (Aveugle) is a sterile alpha motif domain-containing protein, which in association with CNK interacts with KSR and that leads to stimulation of the RAS-dependent RAF activating.                                                             | [130,131] |
| <i>alph</i>                  | <i>alphabet</i>                                          | CG1906                        | <i>alph</i> encodes a protein phosphatase 2C (PP2C) family member, which negatively regulates the MAPK signaling pathway.                                                                                                                            | [132]     |
| <i>14-3-3ε</i>               | <i>14-3-3ε</i>                                           | CG31196                       | <i>14-3-3ε</i> is a member of 14-3-3 protein family, an activator of Ras.                                                                                                                                                                            | [133]     |
| <i>14-3-3ζ</i>               | <i>14-3-3ζ</i>                                           | CG17870                       | <i>14-3-3ζ</i> is a member of the 14-3-3 protein family, an activator of Ras with a partly redundant function with <i>14-3-3ε</i> .                                                                                                                  | [133]     |
| <i>Cdc37</i>                 | <i>Cdc37</i>                                             | CG12019                       | A positive regulation of Raf1.                                                                                                                                                                                                                       | [134]     |
| <i>mago</i>                  | <i>mago nashi</i>                                        | CG9401                        | A positive effector of <i>rl</i> ( <i>MAPK</i> ) transcription.                                                                                                                                                                                      | [126,135] |
| <i>eIF4AIII</i>              | <i>eIF4AIII</i>                                          | CG7483                        | A positive effector of <i>rl</i> ( <i>MAPK</i> ) transcription.                                                                                                                                                                                      | [126,135] |
| <i>Cdk12</i>                 | <i>Cyclin-dependent kinase 12</i>                        | CG7597                        | Cdk12 is RNA polymerase II C-terminal domain kinase, which provides phosphorylation required for transcription elongation, RNA processing, and splicing; Cdk12 is a modulator of <i>rl</i> ( <i>MAPK</i> ) transcription.                            | [126,136] |
| <i>Fip1</i>                  | <i>Fip1</i>                                              | CG1078                        | FIP1 is a modulator of <i>rl</i> ( <i>MAPK</i> ) transcript processing, probably regulating splicing efficiency; FIP1 yeast ortholog encodes a component of a yeast pre-mRNA polyadenylation factor that directly interacts with poly(A) polymerase. | [126,137] |
| <i>CG1603</i>                |                                                          | <i>CG1603</i>                 | <i>CG1603</i> encodes a protein of unknown function that contains MADF type zinc finger domains; modulator of <i>rl</i> ( <i>MAPK</i> ) transcription.                                                                                               | [126]     |
| <i>CG4936</i>                |                                                          | <i>CG4936</i>                 | <i>CG4936</i> encodes a zinc finger protein of unknown function that is related to human BCL-6 like transcription factor that is expressed in hematopoietic tissues; effector of MAPK signalling in <i>Drosophila</i> acting as MEK downstream .     | [126,138] |
| <i>PTP-ER</i>                | <i>Protein tyrosine phosphatase-ERK/Enhancer of Ras1</i> | CG9856                        | Negative regulator of MAPK signalling; transcription of <i>PTP-ER</i> is found to be under <i>CG4936</i> control.                                                                                                                                    | [126]     |
| <i>gfzf</i>                  | <i>GST-containing FLYWCH zinc-finger protein</i>         | CG33546<br>CG10065<br>CG31492 | GFZF affects MEK expression, presumably by regulating mek transcription                                                                                                                                                                              | [126]     |

|  |  |         |  |
|--|--|---------|--|
|  |  | CG31329 |  |
|--|--|---------|--|

**Table 7** JNK signaling pathway components in *D. melanogaster*

| Acronym              | Gene name                                                                       | CG number | Function/Description of the gene product                                                                                                                                 | Reference |
|----------------------|---------------------------------------------------------------------------------|-----------|--------------------------------------------------------------------------------------------------------------------------------------------------------------------------|-----------|
| <i>Src64B</i>        | <i>Src oncogene at 64B</i>                                                      | CG7524    | A non-receptor tyrosine kinase of the Src family; an upstream kinase in “canonical” JNK signalling pathway                                                               | [108]     |
| <i>Btk29A</i>        | <i>Btk family kinase at 29A</i>                                                 | CG8049    | A non-receptor tyrosine kinase of the Src family; an upstream kinase in “canonical” JNK signalling pathway                                                               | [108]     |
| <i>Src42A</i>        | <i>Src oncogene at 42A</i>                                                      | CG44128   | A non-receptor tyrosine kinase of the Src family; an upstream kinase in “canonical” JNK signalling pathway                                                               | [108]     |
| <i>shark</i>         | <i>SH2 ankyrin repeat kinase</i>                                                | CG18247   | Tyrosine kinase Shark plays a crucial role in JNK-mediated dorsal closure, where it acts upstream of JNK                                                                 | [139]     |
| <i>Dok</i>           | <i>Downstream of kinase</i>                                                     | CG2079    | Dok is an adaptor protein of Shark with ability to bind Shark SH2 domains in a tyrosine phosphorylation-dependent fashion; Dok tyrosine phosphorylation is Src dependent | [140]     |
| <i>slpr</i>          | <i>slipper</i>                                                                  | CG2272    | JUN kinase kinase kinase (JNKKK), known as Mixed Lineage Kinase (MLK)                                                                                                    | [112]     |
| <i>msn</i>           | <i>misshapen</i>                                                                | CG16973   | JUN kinase kinase kinase kinase (JNKKKK), kinase associated with MLK                                                                                                     | [141]     |
| <i>Rac1</i>          | <i>Rac1</i>                                                                     | CG2248    | A small GTPase; a main activator of MLK                                                                                                                                  | [141]     |
| <i>egr (TNF)</i>     | <i>eiger (tumor necrosis factor)</i>                                            | CG12919   | A TNF superfamily ligand that triggers the <i>Drosophila</i> JNK pathway                                                                                                 | [142]     |
| <i>wgn (TNFR)</i>    | <i>wengen (tumor necrosis factor receptor)</i>                                  | CG6531    | The receptor of Eiger                                                                                                                                                    | [143]     |
| <i>Traf4 (TRAF1)</i> | <i>TNF-receptor-associated factor 4 (Drosophila homolog of mammalian TRAF1)</i> | CG3048    | Tumor necrosis factor receptor-associated factor, functioning as a signal mediator of cell surface receptor                                                              | [144]     |
| <i>Traf6 (TRAF2)</i> | <i>TNF-receptor-associated factor 4 (Drosophila homolog of mammalian TRAF2)</i> | CG10961   | Tumor necrosis factor receptor-associated factor, functions as a signal mediator of cell surface receptor                                                                | [144]     |
| <i>Tab2</i>          | <i>TAK1-associated-binding protein 2</i>                                        | CG7417    | Adaptor protein, linking dTRAF1 to the JNKKK dTAK1                                                                                                                       | [145]     |

|                      |                                                                     |         |                                                                                                                                                                         |           |
|----------------------|---------------------------------------------------------------------|---------|-------------------------------------------------------------------------------------------------------------------------------------------------------------------------|-----------|
| <i>Tak1</i>          | <i>TGF-<math>\beta</math> activated kinase 1</i>                    | CG18492 | JUN kinase kinase kinase (JNKKK)                                                                                                                                        | [146]     |
| <i>Pk92B (ASK1)</i>  | <i>Protein kinase at 92B (Apoptotic signal-regulating kinase 1)</i> | CG4720  | JUN kinase kinase kinase (JNKKK)                                                                                                                                        | [110,147] |
| <i>Mekk1 (MEKK4)</i> | <i>Mekk1 (MEKK4)</i>                                                | CG7717  | Stress-induced MAP kinase kinase kinase (MKKK), an activator of JNK pathway                                                                                             | [148]     |
| <i>hep (MKK7)</i>    | <i>Hemipterous (MAP kinase kinase 7)</i>                            | CG4353  | JUN kinase kinase (JNKK)                                                                                                                                                | [149]     |
| <i>Mkk4</i>          | <i>MAP kinase kinase 4</i>                                          | CG9738  | JUN kinase kinase (JNKK)                                                                                                                                                | [149]     |
| <i>bsk</i>           | <i>basket</i>                                                       | CG5680  | Encodes a single <i>Drosophila</i> JNK                                                                                                                                  | [150]     |
| <i>Jra (c-Jun)</i>   | Jun-related antigen                                                 | CG2275  | A homolog of mammalian c-Jun; in association with Kayak forms AP-1 transcriptional complex                                                                              | [151]     |
| <i>kay (c-Fos)</i>   | <i>kayak</i>                                                        | CG33956 | A homolog of mammalian c-Fos; in association with Jra forms AP-1 transcriptional complex                                                                                | [151]     |
| <i>Cka</i>           | <i>Connector of kinase to AP-1</i>                                  | CG7392  | Encodes a scaffold molecule suggested to form a complex with Hemipterous and Basket                                                                                     | [148]     |
| <i>dpp</i>           | <i>decapentaple-gic</i>                                             | CG9885  | <i>dpp</i> is a main AP-1 target gene, encoding the <i>Drosophila</i> member of transforming growth factor- $\beta$ (TGF- $\beta$ ) family, a ligand for Dpp signalling | [152,153] |
| <i>puc</i>           | <i>puckered</i>                                                     | CG7850  | A JNK-specific phosphatase that restricts JNK activity in a negative feedback loop                                                                                      | [154,155] |
| <i>chic</i>          | <i>chickadee</i>                                                    | CG9553  | A JNK signaling responsible gene, homolog of vertebrate regulator of actin cytoskeleton profilin                                                                        | [156]     |
| <i>Mmp1</i>          | <i>Matrix metallo-proteinase 1</i>                                  | CG4859  | A primary function of Mmp1 in the JNK pathway control is to promote basement membrane repair, which in turn may permit cell migration and the restoration of tissue     | [113]     |
| <i>Fer1HCH</i>       | <i>Ferritin 1 heavy chain homologue</i>                             | CG2216  | A JNK signaling responsible gene; free radical scavenger                                                                                                                | [104]     |
| <i>MtnA</i>          | <i>Metallothione-in A</i>                                           | CG9470  | A JNK signaling responsible gene; antioxidant                                                                                                                           | [104]     |
| <i>Sesn</i>          | <i>Sestrin</i>                                                      | CG11299 | A JNK signaling responsible gene; antioxidant                                                                                                                           | [51]      |
| <i>NLaz</i>          | <i>Neural Lazarillo</i>                                             | CG33126 | A JNK signaling responsible gene; lipocalin                                                                                                                             | [157]     |
| <i>l(2)efl</i>       | <i>lethal (2) essential for life</i>                                | CG4533  | A JNK signaling target gene; a small heat shock protein, antioxidant                                                                                                    | [104]     |
| <i>GstD1</i>         | <i>Glutathione-S-transferase D1 homologue</i>                       | CG10045 | A JNK signaling target gene; an antioxidant enzyme                                                                                                                      | [104]     |

|                              |                                 |         |                                                                                                                                                                                                                                      |       |
|------------------------------|---------------------------------|---------|--------------------------------------------------------------------------------------------------------------------------------------------------------------------------------------------------------------------------------------|-------|
| <i>Hsp68</i>                 | <i>Heat shock protein 68</i>    | CG5436  | A JNK signaling target gene; <i>Drosophila</i> HSP70                                                                                                                                                                                 | [104] |
| <i>Jafrac1</i>               | <i>thioredoxin peroxidase 1</i> | CG1633  | Jafrac1, a JNK signaling target gene, is a <i>Drosophila</i> homolog of human Peroxiredoxin II (hPrxII), known to act as a downstream effector of JNK/FOXO signaling in neurons that enhance stress resistance and extends life span | [158] |
| <i>aop</i><br>( <i>Yan</i> ) | <i>anterior open</i>            | CG3166  | Negative regulator of JNK pathway, which represses transcriptional activity of AP-1 complex                                                                                                                                          | [151] |
| <i>scaf</i>                  | <i>scarface</i>                 | CG11066 | Inhibitor of JNK pathway, which acts in negative feedback loop as an extracellular pathway regulator                                                                                                                                 | [159] |
| <i>raw</i>                   | <i>raw</i>                      | CG12437 | Negative regulator of JNK signalling pathway, whose molecular mechanisms remain unclear                                                                                                                                              | [160] |
| <i>peb</i>                   | <i>pebbled</i>                  | CG12212 | Inhibitor of JNK signalling pathway with an elusive mechanism                                                                                                                                                                        | [160] |

## REFERENCES

1. Brogiolo W, Stocker H, Ikeya T, Rintelen F, Fernandez R, et al. (2001) An evolutionarily conserved function of the *Drosophila* insulin receptor and insulin-like peptides in growth control. *Curr Biol* 11: 213-221.
2. Broughton SJ, Piper MD, Ikeya T, Bass TM, Jacobson J, et al. (2005) Longer lifespan, altered metabolism, and stress resistance in *Drosophila* from ablation of cells making insulin-like ligands. *Proc Natl Acad Sci U S A* 102: 3105-3110.
3. Grönke S, Clarke DF, Broughton S, Andrews TD, Partridge L (2010) Molecular evolution and functional characterization of *Drosophila* insulin-like peptides. *PLoS Genet* 6: e1000857.
4. Rulifson EJ, Kim SK, Nusse R (2002) Ablation of insulin-producing neurons in flies: growth and diabetic phenotypes. *Science* 296: 1118-1120.
5. Toivonen JM, Partridge L (2009) Endocrine regulation of aging and reproduction in *Drosophila*. *Mol Cell Endocrinol* 299: 39-50.
6. Veenstra JA, Agricola HJ, Sellami A (2008) Regulatory peptides in fruit fly midgut. *Cell Tissue Res* 334: 499-516.
7. Söderberg JA, Birse RT, Nässel DR (2011) Insulin production and signaling in renal tubules of *Drosophila* is under control of tachykinin-related peptide and regulates stress resistance. *PLoS ONE* 6: e19866.
8. Okamoto N, Yamanaka N, Yagi Y, Nishida Y, Kataoka H, et al. (2009) A fat body-derived IGF-like peptide regulates postfeeding growth in *Drosophila*. *Dev Cell* 17: 885-891.
9. Slaidina M, Delanoue R, Grönke S, Partridge L, Leopold P (2009) A *Drosophila* insulin-like peptide promotes growth during nonfeeding states. *Dev Cell* 17: 874-884.
10. Miguel-Aliaga I, Thor S, Gould AP (2008) Postmitotic specification of *Drosophila* insulinergic neurons from pioneer neurons. *PLoS Biol* 6: e58.
11. Yang CH, Belawat P, Hafen E, Jan LY, Jan YN (2008) *Drosophila* egg-laying site selection as a system to study simple decision-making processes. *Science* 319: 1679-1683.
12. Colombani J, Andersen DS, Leopold P (2012) Secreted peptide Dilp8 coordinates *Drosophila* tissue growth with developmental timing. *Science* 336: 582-585.

13. Garelli A, Gontijo AM, Miguela V, Caparros E, Dominguez M (2012) Imaginal discs secrete insulin-like peptide 8 to mediate plasticity of growth and maturation. *Science* 336: 579-582.
14. Fernandez R, Tabarini D, Azpiazu N, Frasch M, Schlessinger J (1995) The *Drosophila* insulin receptor homolog: a gene essential for embryonic development encodes two receptor isoforms with different signaling potential. *EMBO J* 14: 3373-3384.
15. Oldham S, Hafen E (2003) Insulin/IGF and target of rapamycin signaling: a TOR de force in growth control. *Trends Cell Biol* 13: 79-85.
16. Clancy DJ, Gems D, Harshman LG, Oldham S, Stocker H, et al. (2001) Extension of lifespan by loss of CHICO, a *Drosophila* insulin receptor substrate protein. *Science* 292: 104-106.
17. Slack C, Werz C, Wieser D, Alic N, Foley A, et al. (2010) Regulation of lifespan, metabolism, and stress responses by the *Drosophila* SH2B protein, Lnk. *PLoS Genet* 6: e1000881.
18. Werz C, Kohler K, Hafen E, Stocker H (2009) The *Drosophila* SH2B family adaptor Lnk acts in parallel to chico in the insulin signaling pathway. *PLoS genetics* 5: e1000596.
19. Leever SJ (2001) Growth control: invertebrate insulin surprises! *Current biology : CB* 11: R209-212.
20. Williams KD, Busto M, Suster ML, So AK, Ben-Shahar Y, et al. (2006) Natural variation in *Drosophila melanogaster* diapause due to the insulin-regulated PI3-kinase. *Proc Natl Acad Sci USA* 103: 15911-15915.
21. Weinkove D, Leever SJ, MacDougall LK, Waterfield MD (1997) p60 is an adaptor for the *Drosophila* phosphoinositide 3-kinase, Dp110. *J Biol Chem* 272: 14606-14610.
22. Fuss B, Becker T, Zinke I, Hoch M (2006) The cytohesin Steppke is essential for insulin signalling in *Drosophila*. *Nature* 444: 945-948.
23. Cho KS, Lee JH, Kim S, Kim D, Koh H, et al. (2001) *Drosophila* phosphoinositide-dependent kinase-1 regulates apoptosis and growth via the phosphoinositide 3-kinase-dependent signaling pathway. *Proceedings of the National Academy of Sciences of the United States of America* 98: 6144-6149.
24. Teleman AA, Chen YW, Cohen SM (2005) 4E-BP functions as a metabolic brake used under stress conditions but not during normal growth. *Genes & development* 19: 1844-1848.
25. Puig O, Marr MT, Ruhf ML, Tjian R (2003) Control of cell number by *Drosophila* FOXO: downstream and feedback regulation of the insulin receptor pathway. *Genes & development* 17: 2006-2020.
26. Frame S, Cohen P, Biondi RM (2001) A common phosphate binding site explains the unique substrate specificity of GSK3 and its inactivation by phosphorylation. *Molecular cell* 7: 1321-1327.
27. Dombradi V, Matko J, Kiss Z, Kiss L, Friedrich P, et al. (1986) Structural and functional properties of *Drosophila melanogaster* phosphorylase: comparison with the rabbit skeletal muscle enzyme. *Comparative biochemistry and physiology B, Comparative biochemistry* 84: 537-543.
28. Okamura T, Shimizu H, Nagao T, Ueda R, Ishii S (2007) ATF-2 regulates fat metabolism in *Drosophila*. *Molecular biology of the cell* 18: 1519-1529.
29. Wang B, Moya N, Niessen S, Hoover H, Mihaylova MM, et al. (2011) A hormone-dependent module regulating energy balance. *Cell* 145: 596-606.
30. Grönke S, Mildner A, Fellert S, Tennagels N, Petry S, et al. (2005) Brummer lipase is an evolutionary conserved fat storage regulator in *Drosophila*. *Cell Metabol* 1: 323-330.
31. Furuyama T, Kitayama K, Yamashita H, Mori N (2003) Forkhead transcription factor FOXO1 (FKHR)-dependent induction of PDK4 gene expression in skeletal muscle during energy deprivation. *The Biochemical journal* 375: 365-371.
32. Sedding DG (2008) FoxO transcription factors in oxidative stress response and ageing--a new fork on the way to longevity? *Biological chemistry* 389: 279-283.
33. van der Horst A, Burgering BM (2007) Stressing the role of FoxO proteins in lifespan and disease. *Nature reviews Molecular cell biology* 8: 440-450.



34. Tettweiler G, Miron M, Jenkins M, Sonenberg N, Lasko PF (2005) Starvation and oxidative stress resistance in *Drosophila* are mediated through the eIF4E-binding protein, d4E-BP. *Genes & development* 19: 1840-1843.
35. Teleman AA (2010) Molecular mechanisms of metabolic regulation by insulin in *Drosophila*. *Biochem J* 425: 13-26.
36. Xie Q, Chen J, Yuan Z (2012) Post-translational regulation of FOXO. *Acta biochimica et biophysica Sinica* 44: 897-901.
37. Palanker L, Tennessen JM, Lam G, Thummel CS (2009) *Drosophila* HNF4 regulates lipid mobilization and beta-oxidation. *Cell metabolism* 9: 228-239.
38. Altarejos JY, Montminy M (2011) CREB and the CRTC co-activators: sensors for hormonal and metabolic signals. *Nature reviews Molecular cell biology* 12: 141-151.
39. Karpac J, Jasper H (2011) Metabolic homeostasis: HDACs take center stage. *Cell* 145: 497-499.
40. Colombani J, Raisin S, Pantalacci S, Radimerski T, Montagne J, et al. (2003) A nutrient sensor mechanism controls *Drosophila* growth. *Cell* 114: 739-749.
41. Goberdhan DC, Meredith D, Boyd CA, Wilson C (2005) PAT-related amino acid transporters regulate growth via a novel mechanism that does not require bulk transport of amino acids. *Development* 132: 2365-2375.
42. Martin JF, Hersperger E, Simcox A, Shearn A (2000) *minidiscs* encodes a putative amino acid transporter subunit required non-autonomously for imaginal cell proliferation. *Mech Dev* 92: 155-167.
43. Wullschlegel S, Loewith R, Hall MN (2006) TOR signaling in growth and metabolism. *Cell* 124: 471-484.
44. Kim E, Goraksha-Hicks P, Li L, Neufeld TP, Guan KL (2008) Regulation of TORC1 by Rag GTPases in nutrient response. *Nature cell biology* 10: 935-945.
45. Yang H, Gong R, Xu Y (2013) Control of cell growth: Rag GTPases in activation of TORC1. *Cellular and molecular life sciences : CMLS* 70: 2873-2885.
46. Hall DJ, Grewal SS, de la Cruz AF, Edgar BA (2007) Rheb-TOR signaling promotes protein synthesis, but not glucose or amino acid import, in *Drosophila*. *BMC Biol* 5: 10.
47. Zhang Y, Gao X, Saucedo LJ, Ru B, Edgar BA, et al. (2003) Rheb is a direct target of the tuberous sclerosis tumour suppressor proteins. *Nature cell biology* 5: 578-581.
48. Pan DA, Hardie DG (2002) A homologue of AMP-activated protein kinase in *Drosophila melanogaster* is sensitive to AMP and is activated by ATP depletion. *Biochem J* 367: 179-186.
49. Inoki K, Zhu T, Guan KL (2003) TSC2 mediates cellular energy response to control cell growth and survival. *Cell* 115: 577-590.
50. Inoki K, Ouyang H, Zhu T, Lindvall C, Wang Y, et al. (2006) TSC2 integrates Wnt and energy signals via a coordinated phosphorylation by AMPK and GSK3 to regulate cell growth. *Cell* 126: 955-968.
51. Lee JH, Budanov AV, Park EJ, Birse R, Kim TE, et al. (2010) Sestrin as a Feedback Inhibitor of TOR That Prevents Age-Related Pathologies. *Science* 327: 1223-1228.
52. Hernandez G, Altmann M, Sierra JM, Urlaub H, Diez del Corral R, et al. (2005) Functional analysis of seven genes encoding eight translation initiation factor 4E (eIF4E) isoforms in *Drosophila*. *Mech Dev* 122: 529-543.
53. Grewal SS, Evans JR, Edgar BA (2007) *Drosophila* TIF-IA is required for ribosome synthesis and cell growth and is regulated by the TOR pathway. *The Journal of cell biology* 179: 1105-1113.
54. Chang YY, Neufeld TP (2010) Autophagy takes flight in *Drosophila*. *FEBS letters* 584: 1342-1349.
55. Dekanty A, Lavista-Llanos S, Irisarri M, Oldham S, Wappner P (2005) The insulin-PI3K/TOR pathway induces a HIF-dependent transcriptional response in *Drosophila* by promoting nuclear localization of HIF-alpha/Sima. *Journal of cell science* 118: 5431-5441.
56. Reiling JH, Hafen E (2004) The hypoxia-induced paralogs Scylla and Charybdis inhibit growth by down-regulating S6K activity upstream of TSC in *Drosophila*. *Genes Dev* 18: 2879-2892.
57. Teleman AA, Hietakangas V, Sayadian AC, Cohen SM (2008) Nutritional control of protein biosynthetic capacity by insulin via Myc in *Drosophila*. *Cell Metab* 7: 21-32.

58. Guertin DA, Guntur KV, Bell GW, Thoreen CC, Sabatini DM (2006) Functional genomics identifies TOR-regulated genes that control growth and division. *Current biology* : CB 16: 958-970.
59. Zaffran S, Chartier A, Gallant P, Astier M, Arquier N, et al. (1998) A *Drosophila* RNA helicase gene, *pitchoune*, is required for cell growth and proliferation and is a potential target of d-Myc. *Development* 125: 3571-3584.
60. Migeon JC, Garfinkel MS, Edgar BA (1999) Cloning and characterization of *peter pan*, a novel *Drosophila* gene required for larval growth. *Mol Biol Cell* 10: 1733-1744.
61. Giordano E, Peluso I, Senger S, Furia M (1999) *minifly*, a *Drosophila* gene required for ribosome biogenesis. *J Cell Biol* 144: 1123-1133.
62. Kim SK, Rulifson EJ (2004) Conserved mechanisms of glucose sensing and regulation by *Drosophila* corpora cardiaca cells. *Nature* 431: 316-320.
63. Lee G, Park JH (2004) Hemolymph sugar homeostasis and starvation-induced hyperactivity affected by genetic manipulations of the adipokinetic hormone-encoding gene in *Drosophila melanogaster*. *Genetics* 167: 311-323.
64. Staubli F, Jorgensen TJ, Cazzamali G, Williamson M, Lenz C, et al. (2002) Molecular identification of the insect adipokinetic hormone receptors. *Proc Natl Acad Sci U S A* 99: 3446-3451.
65. Brubaker-Purkey BJ, Woodruff RI (2013) Vitellogenesis in the fruit fly, *Drosophila melanogaster*: antagonists demonstrate that the PLC, IP3/DAG, PK-C pathway is triggered by calmodulin. *J Insect Sci* 13: 68.
66. Gäde G, Auerswald L (2003) Mode of action of neuropeptides from the adipokinetic hormone family. *Gen Comp Endocrinol* 132: 10-20.
67. Baumbach J, Xu Y, Hehlert P, Kuhnlein RP (2014) Galphaq, Ggamma1 and Plc21C control *Drosophila* body fat storage. *Journal of genetics and genomics* 41: 283-292.
68. Bahri SM, Chia W (1994) DPhK-gamma, a putative *Drosophila* kinase with homology to vertebrate phosphorylase kinase gamma subunits: molecular characterisation of the gene and phenotypic analysis of loss of function mutants. *Mol Gen Genet* 245: 588-597.
69. Tick G, Cserpan I, Dombradi V, Mechler BM, Torok I, et al. (1999) Structural and functional characterization of the *Drosophila* glycogen phosphorylase gene. *Biochem Biophys Res Commun* 257: 34-43.
70. Beller M, Bulankina AV, Hsiao HH, Urlaub H, Jackle H, et al. (2010) PERILIPIN-dependent control of lipid droplet structure and fat storage in *Drosophila*. *Cell Metab* 12: 521-532.
71. Patel RT, Soulages JL, Hariharasundaram B, Arrese EL (2005) Activation of the lipid droplet controls the rate of lipolysis of triglycerides in the insect fat body. *J Biol Chem* 280: 22624-22631.
72. Bi J, Xiang Y, Chen H, Liu Z, Gronke S, et al. (2012) Opposite and redundant roles of the two *Drosophila* perilipins in lipid mobilization. *J Cell Sci* 125: 3568-3577.
73. Miyoshi H, Souza SC, Zhang HH, Strissel KJ, Christoffolete MA, et al. (2006) Perilipin promotes hormone-sensitive lipase-mediated adipocyte lipolysis via phosphorylation-dependent and -independent mechanisms. *J Biol Chem* 281: 15837-15844.
74. Sztalryd C, Xu G, Dorward H, Tansey JT, Contreras JA, et al. (2003) Perilipin A is essential for the translocation of hormone-sensitive lipase during lipolytic activation. *J Cell Biol* 161: 1093-1103.
75. Kuhnlein RP (2011) The contribution of the *Drosophila* model to lipid droplet research. *Progress in lipid research* 50: 348-356.
76. Buch S, Melcher C, Bauer M, Katzenberger J, Pankratz MJ (2008) Opposing effects of dietary protein and sugar regulate a transcriptional target of *Drosophila* insulin-like peptide signaling. *Cell Metab* 7: 321-332.
77. Agaisse H, Perrimon N (2004) The roles of JAK/STAT signaling in *Drosophila* immune responses. *Immunol Rev* 198: 72-82.
78. Bach EA, Vincent S, Zeidler MP, Perrimon N (2003) A sensitized genetic screen to identify novel regulators and components of the *Drosophila* janus kinase/signal transducer and activator of transcription pathway. *Genetics* 165: 1149-1166.
79. Arbouzova NI, Zeidler MP (2006) JAK/STAT signalling in *Drosophila*: insights into conserved regulatory and cellular functions. *Development* 133: 2605-2616.

80. Ghiglione C, Devergne O, Georgenthum E, Carballes F, Medioni C, et al. (2002) The *Drosophila* cytokine receptor Domeless controls border cell migration and epithelial polarization during oogenesis. *Development* 129: 5437-5447.
81. Baeg GH, Zhou R, Perrimon N (2005) Genome-wide RNAi analysis of JAK/STAT signaling components in *Drosophila*. *Genes Dev* 19: 1861-1870.
82. Rawlings JS, Rosler KM, Harrison DA (2004) The JAK/STAT signaling pathway. *Journal of cell science* 117: 1281-1283.
83. Stec WJ, Zeidler MP (2011) *Drosophila* SOCS Proteins. *J Signal Transduct* 2011: 894510.
84. Stec W, Vidal O, Zeidler MP (2013) *Drosophila* SOCS36E negatively regulates JAK/STAT pathway signaling via two separable mechanisms. *Molecular Biology of the Cell* 24: 3000-3009.
85. Karsten P, Hader S, Zeidler MP (2002) Cloning and expression of *Drosophila* SOCS36E and its potential regulation by the JAK/STAT pathway. *Mechanisms of development* 117: 343-346.
86. Betz A, Lampen N, Martinek S, Young MW, Darnell JE, Jr. (2001) A *Drosophila* PIAS homologue negatively regulates stat92E. *Proc Natl Acad Sci U S A* 98: 9563-9568.
87. Agaisse H, Petersen UM, Boutros M, Mathey-Prevot B, Perrimon N (2003) Signaling role of hemocytes in *Drosophila* JAK/STAT-dependent response to septic injury. *Dev Cell* 5: 441-450.
88. Gronholm J, Kaustio M, Myllymaki H, Kallio J, Saarikettu J, et al. (2012) Not4 enhances JAK/STAT pathway-dependent gene expression in *Drosophila* and in human cells. *FASEB J* 26: 1239-1250.
89. Müller P, Kutenkeuler D, Gesellchen V, Zeidler MP, Boutros M (2005) Identification of JAK/STAT signalling components by genome-wide RNA interference. *Nature* 436: 871-875.
90. Coste F, Kemp C, Bobezeau V, Hetru C, Kellenberger C, et al. (2012) Crystal structure of Dieder, a marker of the immune response of *Drosophila melanogaster*. *PLoS One* 7: e33416.
91. Kallio J, Myllymaki H, Gronholm J, Armstrong M, Vanha-aho LM, et al. (2010) Eye transformer is a negative regulator of *Drosophila* JAK/STAT signaling. *FASEB J* 24: 4467-4479.
92. Zhang Y, You J, Ren W, Lin X (2013) *Drosophila* glypicans Dally and Dally-like are essential regulators for JAK/STAT signaling and Unpaired distribution in eye development. *Dev Biol* 375: 23-32.
93. Ekengren S, Hultmark D (2001) A family of Turandot-related genes in the humoral stress response of *Drosophila*. *Biochem Biophys Res Commun* 284: 998-1003.
94. Wang HZ, Brown J, Gao SG, Liang S, Jotwani R, et al. (2013) The Role of JAK-3 in Regulating TLR-Mediated Inflammatory Cytokine Production in Innate Immune Cells. *Journal of Immunology* 191: 1164-1174.
95. Taniai K, Inceoglu AB, Yukuhiro K, Hammock BD (2003) Characterization and cDNA cloning of a clofibrate-inducible microsomal epoxide hydrolase in *Drosophila melanogaster*. *Eur J Biochem* 270: 4696-4705.
96. Leatherman JL, Dinardo S (2008) Zfh-1 controls somatic stem cell self-renewal in the *Drosophila* testis and nonautonomously influences germline stem cell self-renewal. *Cell Stem Cell* 3: 44-54.
97. Postigo AA, Ward E, Skeath JB, Dean DC (1999) zfh-1, the *Drosophila* homologue of ZEB, is a transcriptional repressor that regulates somatic myogenesis. *Mol Cell Biol* 19: 7255-7263.
98. Yan R, Small S, Desplan C, Dearolf CR, Darnell JE, Jr. (1996) Identification of a Stat gene that functions in *Drosophila* development. *Cell* 84: 421-430.
99. Flaherty MS, Salis P, Evans CJ, Ekas LA, Marouf A, et al. (2010) chinmo Is a Functional Effector of the JAK/STAT Pathway that Regulates Eye Development, Tumor Formation, and Stem Cell Self-Renewal in *Drosophila*. *Developmental Cell* 18: 556-568.
100. Dostert C, Jouanguy E, Irving P, Troxler L, Galiana-Arnoux D, et al. (2005) The Jak-STAT signaling pathway is required but not sufficient for the antiviral response of *drosophila*. *Nat Immunol* 6: 946-953.

101. Bou Aoun R, Hetru C, Troxler L, Doucet D, Ferrandon D, et al. (2011) Analysis of thioester-containing proteins during the innate immune response of *Drosophila melanogaster*. *J Innate Immun* 3: 52-64.
102. Schaber MD, O'Hara MB, Garsky VM, Mosser SC, Bergstrom JD, et al. (1990) Polyisoprenylation of Ras in vitro by a farnesyl-protein transferase. *J Biol Chem* 265: 14701-14704.
103. Stevens LM, Frohnhof HG, Klingler M, Nusslein-Volhard C (1990) Localized requirement for torso-like expression in follicle cells for development of terminal Anlagen of the *Drosophila* embryo. *Nature* 346: 660-663.
104. Wang MC, Bohmann D, Jasper H (2003) JNK signaling confers tolerance to oxidative stress and extends lifespan in *Drosophila*. *Dev Cell* 5: 811-816.
105. Valanne S, Wang JH, Ramet M (2011) The *Drosophila* Toll signaling pathway. *J Immunol* 186: 649-656.
106. Therrien M, Wong AM, Rubin GM (1998) CNK, a RAF-binding multidomain protein required for RAS signaling. *Cell* 95: 343-353.
107. Therrien M, Chang HC, Solomon NM, Karim FD, Wassarman DA, et al. (1995) KSR, a novel protein kinase required for RAS signal transduction. *Cell* 83: 879-888.
108. Tateno M, Nishida Y, Adachi-Yamada T (2000) Regulation of JNK by Src during *Drosophila* development. *Science* 287: 324-327.
109. Wellbrock C, Karasarides M, Marais R (2004) The RAF proteins take centre stage. *Nat Rev Mol Cell Biol* 5: 875-885.
110. Wassarman DA, Solomon NM, Rubin GM (1996) Pk92B: a *Drosophila melanogaster* protein kinase that belongs to the MEKK family. *Gene* 169: 283-284.
111. Tsuda L, Inoue YH, Yoo MA, Mizuno M, Hata M, et al. (1993) A protein kinase similar to MAP kinase activator acts downstream of the raf kinase in *Drosophila*. *Cell* 72: 407-414.
112. Stronach B, Perrimon N (2002) Activation of the JNK pathway during dorsal closure in *Drosophila* requires the mixed lineage kinase, slipper. *Genes Dev* 16: 377-387.
113. Stevens LJ, Page-McCaw A (2012) A secreted MMP is required for reepithelialization during wound healing. *Molecular Biology of the Cell* 23: 1068-1079.
114. Martin JR, Raibaud A, Olo R (1994) Terminal pattern elements in *Drosophila* embryo induced by the torso-like protein. *Nature* 367: 741-745.
115. Johnson TK, Crossman T, Foote KA, Henstridge MA, Saligari MJ, et al. (2013) Torso-like functions independently of Torso to regulate *Drosophila* growth and developmental timing. *Proc Natl Acad Sci U S A* 110: 14688-14692.
116. Casanova J, Struhl G (1989) Localized surface activity of torso, a receptor tyrosine kinase, specifies terminal body pattern in *Drosophila*. *Genes Dev* 3: 2025-2038.
117. Henstridge MA, Johnson TK, Warr CG, Whisstock JC (2014) Trunk cleavage is essential for *Drosophila* terminal patterning and can occur independently of Torso-like. *Nat Commun* 5: 3419.
118. Hart AC, Kramer H, Van Vactor DL, Jr., Paidhungat M, Zipursky SL (1990) Induction of cell fate in the *Drosophila* retina: the bride of sevenless protein is predicted to contain a large extracellular domain and seven transmembrane segments. *Genes Dev* 4: 1835-1847.
119. Kohyama-Koganeya A, Kim YJ, Miura M, Hirabayashi Y (2008) A *Drosophila* orphan G protein-coupled receptor BOSS functions as a glucose-responding receptor: loss of boss causes abnormal energy metabolism. *Proc Natl Acad Sci U S A* 105: 15328-15333.
120. Basler K, Hafen E (1989) Ubiquitous expression of sevenless: position-dependent specification of cell fate. *Science* 243: 931-934.
121. Basler K, Hafen E (1989) Dynamics of *Drosophila* eye development and temporal requirements of sevenless expression. *Development* 107: 723-731.
122. Olivier JP, Raabe T, Henkemeyer M, Dickson B, Mbamalu G, et al. (1993) A *Drosophila* SH2-SH3 adaptor protein implicated in coupling the sevenless tyrosine kinase to an activator of Ras guanine nucleotide exchange, Sos. *Cell* 73: 179-191.
123. Perkins LA, Larsen I, Perrimon N (1992) corkscrew encodes a putative protein tyrosine phosphatase that functions to transduce the terminal signal from the receptor tyrosine kinase torso. *Cell* 70: 225-236.

124. Buday L, Downward J (1993) Epidermal growth factor regulates p21ras through the formation of a complex of receptor, Grb2 adapter protein, and Sos nucleotide exchange factor. *Cell* 73: 611-620.
125. Karim FD, Chang HC, Therrien M, Wassarman DA, Laverty T, et al. (1996) A screen for genes that function downstream of Ras1 during *Drosophila* eye development. *Genetics* 143: 315-329.
126. Ashton-Beaucage D, Udell CM, Gendron P, Sahmi M, Lefrancois M, et al. (2014) A functional screen reveals an extensive layer of transcriptional and splicing control underlying RAS/MAPK signaling in *Drosophila*. *PLoS Biol* 12: e1001809.
127. Leever SJ, Paterson HF, Marshall CJ (1994) Requirement for Ras in Raf activation is overcome by targeting Raf to the plasma membrane. *Nature* 369: 411-414.
128. Baccarini M (2005) Second nature: biological functions of the Raf-1 "kinase". *FEBS Lett* 579: 3271-3277.
129. Lim YM, Nishizawa K, Nishi Y, Tsuda L, Inoue YH, et al. (1999) Genetic analysis of rolled, which encodes a *Drosophila* mitogen-activated protein kinase. *Genetics* 153: 763-771.
130. Douziech M, Sahmi M, Laberge G, Therrien M (2006) A KSR/CNK complex mediated by HYP, a novel SAM domain-containing protein, regulates RAS-dependent RAF activation in *Drosophila*. *Genes Dev* 20: 807-819.
131. Claperon A, Therrien M (2007) KSR and CNK: two scaffolds regulating RAS-mediated RAF activation. *Oncogene* 26: 3143-3158.
132. Baril C, Therrien M (2006) Alphabet, a Ser/Thr phosphatase of the protein phosphatase 2C family, negatively regulates RAS/MAPK signaling in *Drosophila*. *Dev Biol* 294: 232-245.
133. Chang HC, Rubin GM (1997) 14-3-3 epsilon positively regulates Ras-mediated signaling in *Drosophila*. *Genes Dev* 11: 1132-1139.
134. Grammatikakis N, Lin JH, Grammatikakis A, Tsihchlis PN, Cochran BH (1999) p50(cdc37) acting in concert with Hsp90 is required for Raf-1 function. *Mol Cell Biol* 19: 1661-1672.
135. Ashton-Beaucage D, Udell CM, Lavoie H, Baril C, Lefrancois M, et al. (2010) The exon junction complex controls the splicing of MAPK and other long intron-containing transcripts in *Drosophila*. *Cell* 143: 251-262.
136. Phatnani HP, Greenleaf AL (2006) Phosphorylation and functions of the RNA polymerase II CTD. *Genes Dev* 20: 2922-2936.
137. Preker PJ, Lingner J, Minvielle-Sebastia L, Keller W (1995) The FIP1 gene encodes a component of a yeast pre-mRNA polyadenylation factor that directly interacts with poly(A) polymerase. *Cell* 81: 379-389.
138. Zhang W, Mi J, Li N, Sui L, Wan T, et al. (2001) Identification and characterization of DPZF, a novel human BTB/POZ zinc finger protein sharing homology to BCL-6. *Biochem Biophys Res Commun* 282: 1067-1073.
139. Fernandez R, Takahashi F, Liu Z, Steward R, Stein D, et al. (2000) The *Drosophila* shark tyrosine kinase is required for embryonic dorsal closure. *Genes Dev* 14: 604-614.
140. Biswas R, Stein D, Stanley ER (2006) *Drosophila* Dok is required for embryonic dorsal closure. *Development* 133: 217-227.
141. Garland RA, Gonda RL, Green AB, Pileggi RM, Stronach B (2010) Regulation of mixed-lineage kinase activation in JNK-dependent morphogenesis. *J Cell Sci* 123: 3177-3188.
142. Igaki T, Kanda H, Yamamoto-Goto Y, Kanuka H, Kuranaga E, et al. (2002) Eiger, a TNF superfamily ligand that triggers the *Drosophila* JNK pathway. *EMBO J* 21: 3009-3018.
143. Kauppila S, Maaty WS, Chen P, Tomar RS, Eby MT, et al. (2003) Eiger and its receptor, Wengen, comprise a TNF-like system in *Drosophila*. *Oncogene* 22: 4860-4867.
144. Cha GH, Cho KS, Lee JH, Kim M, Kim E, et al. (2003) Discrete functions of TRAF1 and TRAF2 in *Drosophila melanogaster* mediated by c-Jun N-terminal kinase and NF-kappaB-dependent signaling pathways. *Mol Cell Biol* 23: 7982-7991.
145. Geuking P, Narasimamurthy R, Basler K (2005) A genetic screen targeting the tumor necrosis factor/Eiger signaling pathway: identification of *Drosophila* TAB2 as a functionally conserved component. *Genetics* 171: 1683-1694.
146. Mihaly J, Kockel L, Gaengel K, Weber U, Bohmann D, et al. (2001) The role of the *Drosophila* TAK homologue dTAK during development. *Mech Dev* 102: 67-79.

147. Kuranaga E, Kanuka H, Igaki T, Sawamoto K, Ichijo H, et al. (2002) Reaper-mediated inhibition of DIAP1-induced DTRAF1 degradation results in activation of JNK in *Drosophila*. *Nat Cell Biol* 4: 705-710.
148. Chen W, White MA, Cobb MH (2002) Stimulus-specific requirements for MAP3 kinases in activating the JNK pathway. *J Biol Chem* 277: 49105-49110.
149. Geuking P, Narasimamurthy R, Lemaitre B, Basler K, Leulier F (2009) A non-redundant role for *Drosophila* Mkk4 and hemipterous/Mkk7 in TAK1-mediated activation of JNK. *PLoS One* 4: e7709.
150. Riesgo-Escovar JR, Jenni M, Fritz A, Hafen E (1996) The *Drosophila* Jun-N-terminal kinase is required for cell morphogenesis but not for DJun-dependent cell fate specification in the eye. *Genes & Development* 10: 2759-2768.
151. Riesgo-Escovar JR, Hafen E (1997) *Drosophila* Jun kinase regulates expression of decapentaplegic via the ETS-domain protein Aop and the AP-1 transcription factor DJun during dorsal closure. *Genes Dev* 11: 1717-1727.
152. Raftery LA, Sutherland DJ (1999) TGF-beta family signal transduction in *Drosophila* development: from Mad to Smads. *Dev Biol* 210: 251-268.
153. Fernandez BG, Arias AM, Jacinto A (2007) Dpp signalling orchestrates dorsal closure by regulating cell shape changes both in the amnioserosa and in the epidermis. *Mech Dev* 124: 884-897.
154. Martin-Blanco E, Gampel A, Ring J, Virdee K, Kirov N, et al. (1998) puckered encodes a phosphatase that mediates a feedback loop regulating JNK activity during dorsal closure in *Drosophila*. *Genes Dev* 12: 557-570.
155. McEwen DG, Peifer M (2005) Puckered, a *Drosophila* MAPK phosphatase, ensures cell viability by antagonizing JNK-induced apoptosis. *Development* 132: 3935-3946.
156. Jasper H, Benes V, Schwager C, Sauer S, Clauder-Munster S, et al. (2001) The genomic response of the *Drosophila* embryo to JNK signaling. *Dev Cell* 1: 579-586.
157. Hull-Thompson J, Muffat J, Sanchez D, Walker DW, Benzer S, et al. (2009) Control of metabolic homeostasis by stress signaling is mediated by the lipocalin NLaz. *PLoS Genet* 5: e1000460.
158. Lee KS, Iijima-Ando K, Iijima K, Lee WJ, Lee JH, et al. (2009) JNK/FOXO-mediated neuronal expression of fly homologue of peroxiredoxin II reduces oxidative stress and extends life span. *J Biol Chem* 284: 29454-29461.
159. Rousset R, Bono-Lauriol S, Gettings M, Suzanne M, Speder P, et al. (2010) The *Drosophila* serine protease homologue Scarface regulates JNK signalling in a negative-feedback loop during epithelial morphogenesis. *Development* 137: 2177-2186.
160. Reed BH, Wilk R, Lipshitz HD (2001) Downregulation of Jun kinase signaling in the amnioserosa is essential for dorsal closure of the *Drosophila* embryo. *Curr Biol* 11: 1098-1108.
