# Supplementary material for: Slowed aging during reproductive dormancy is reflected in genome-wide transcriptome changes in Drosophila melanogaster
Source: PubMed Central journal article supplement (PMC4711038; doi:10.1186/s12864-016-2383-1), 2016-01-13
Supplement: 12864_2016_2383_MOESM10_ESM.pdf [file 12864_2016_2383_MOESM10_ESM.pdf]

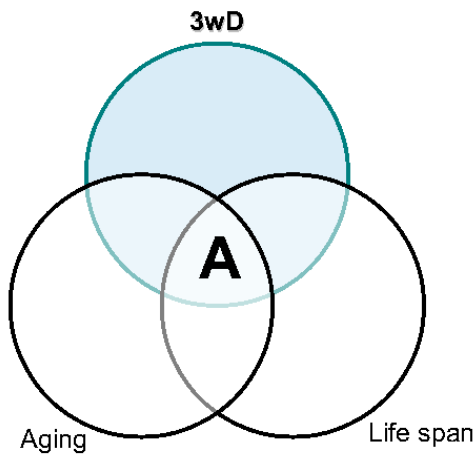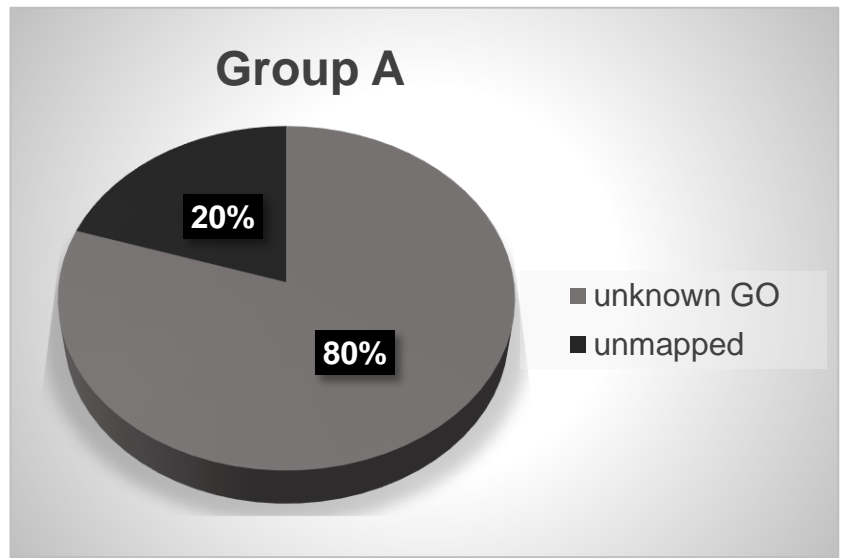

| Term         | Backgr. frequency | Sample frequency | Fold enrichment | +/- | P-value  |
|--------------|-------------------|------------------|-----------------|-----|----------|
| Unclassified | 3044              | 32               | 1.03            | +   | 0.00E+00 |

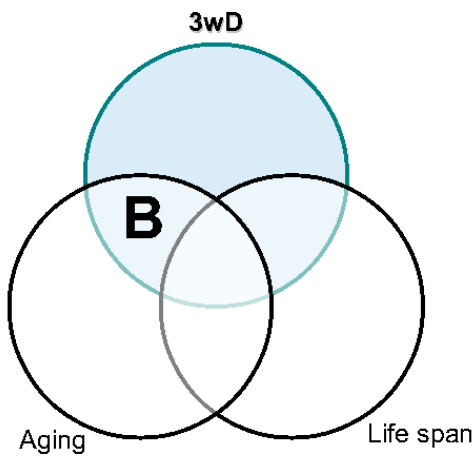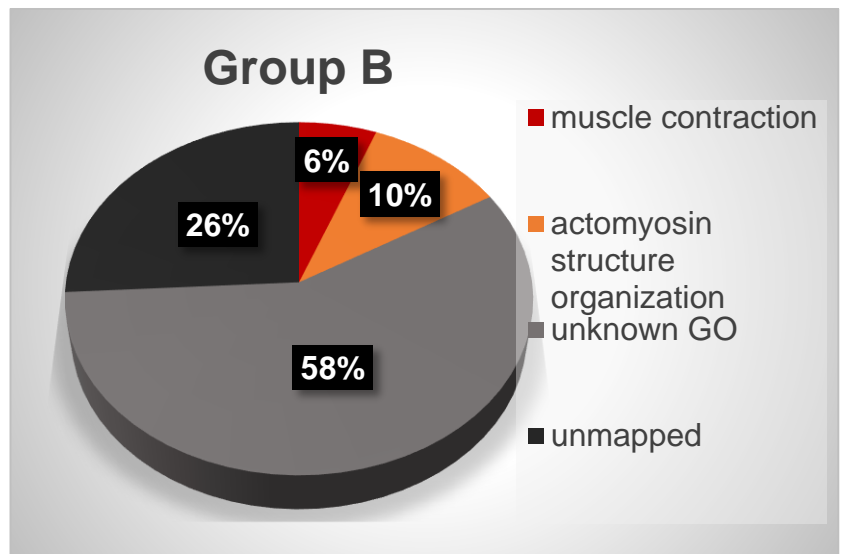

| Term                                           | Backgr. frequency | Sample frequency | Fold enrichment | +/- | P-value  |
|------------------------------------------------|-------------------|------------------|-----------------|-----|----------|
| Muscle contraction (GO:0006936)                | 15                | 5                | >5              | +   | 3.74E-02 |
| Muscle system process (GO:0003012)             | 22                | 6                | >5              | +   | 1.59E-02 |
| Myofibril assembly (GO:0030239)                | 40                | 7                | >5              | +   | 4.64E-02 |
| Striated muscle cell development(GO:0055002)   | 54                | 8                | >5              | +   | 3.84E-02 |
| Muscle cell development (GO:0055001)           | 54                | 8                | >5              | +   | 3.84E-02 |
| Actomyosin structure organization (GO:0031032) | 66                | 9                | >5              | +   | 2.16E-02 |
| Unclassified                                   | 3044              | 49               | 0.82            | -   | 0.00E+00 |

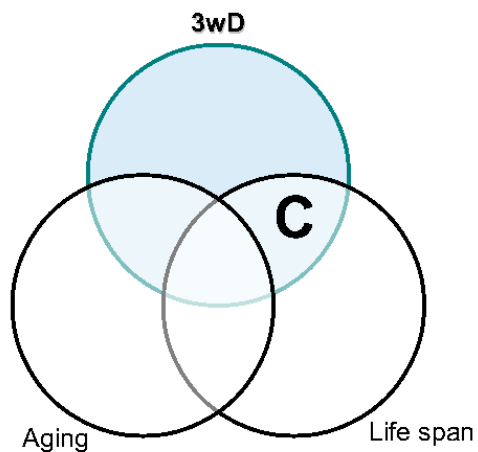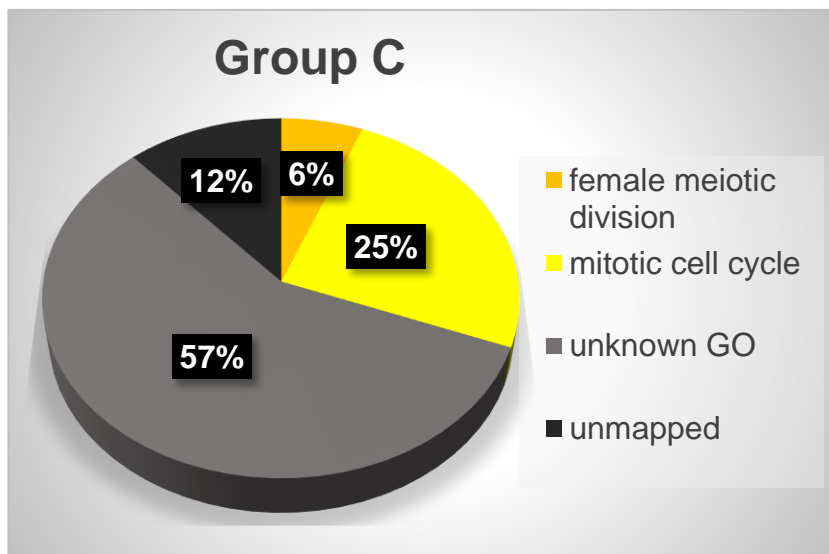

| Term                                                     | Backgr. frequency | Sample frequency | Fold enrichment | +/- | P-value  |
|----------------------------------------------------------|-------------------|------------------|-----------------|-----|----------|
| Spindle assembly involved in female meiosis (GO:0007056) | 15                | 6                | >5              | +   | 4.87E-02 |
| Female meiotic division(GO:0007143)                      | 73                | 12               | 4.69            | +   | 3.87E-02 |
| Meiotic cell cycle (GO:0051321)                          | 538               | 40               | 2.12            | +   | 2.49E-02 |
| Cell cycle (GO:0007049)                                  | 729               | 54               | 2.11            | +   | 6.99E-04 |
| Cell cycle process (GO:0022402)                          | 674               | 49               | 2.07            | +   | 4.38E-03 |
| Unclassified                                             | 3044              | 114              | 1.07            | +   | 0.00E+00 |

## Group D

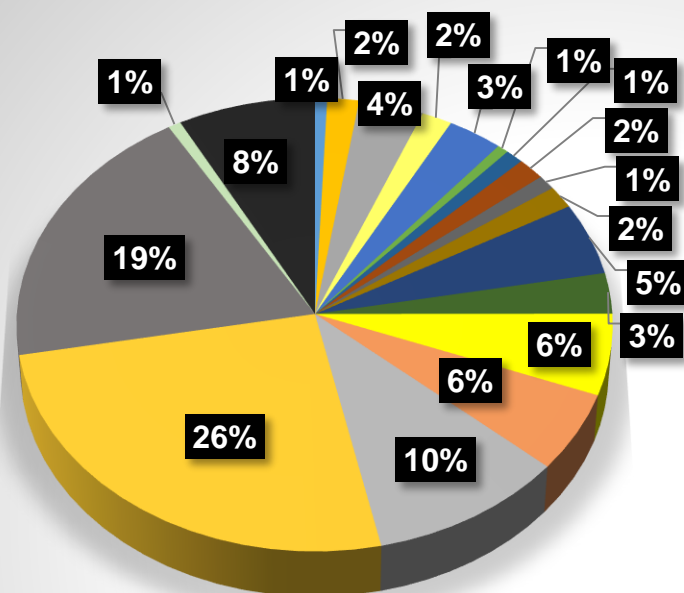

- negative regulation of histone modification
- female meiotic division
- DNA conformation change
- DNA replication
- chromosome segregation
- reciprocal meiotic recombination
- chromosome condensation
- DNA-templated transcription, initiation
- negative regulation of gene expression, epigenetic
- centrosome cycle
- organelle fission
- cellular response to DNA damage stimulus
- mitotic cell cycle
- negative regulation of metabolic process
- regulation of gene expression
- primary metabolic process
- unknown GO
- translation
- unmapped

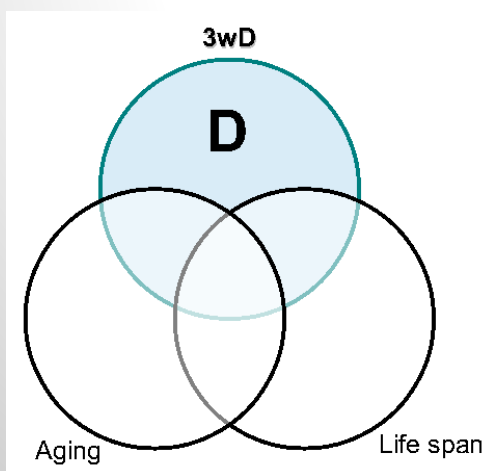

| Term                                           | Backgr. Frequency | Sample frequency | Fold Enrichment | +/- | P value  |
|------------------------------------------------|-------------------|------------------|-----------------|-----|----------|
| Negative regulation of histone modification    | 5                 | 18               | > 5             | +   | 4.42E-15 |
| Negative regulation of chromatin modification  | 15                | 22               | > 5             | +   | 7.15E-11 |
| Nucleosome assembly                            | 65                | 65               | > 5             | +   | 1.95E-26 |
| Female meiosis chromosome segregation          | 34                | 32               | > 5             | +   | 2.46E-11 |
| Chromatin assembly                             | 73                | 67               | > 5             | +   | 3.20E-25 |
| Negative regulation of chromosome organization | 30                | 27               | > 5             | +   | 7.89E-09 |
| Protein-DNA complex assembly                   | 85                | 76               | > 5             | +   | 3.64E-28 |
| Regulation of histone modification             | 26                | 23               | > 5             | +   | 4.31E-07 |
| Nucleosome organization                        | 80                | 66               | > 5             | +   | 2.62E-22 |
| DNA packaging                                  | 122               | 93               | 4.68            | +   | 1.04E-29 |
| Protein-DNA complex subunit organization       | 107               | 78               | 4.48            | +   | 2.22E-23 |
| DNA conformation change                        | 134               | 96               | 4.4             | +   | 1.08E-28 |

| Term                                                   | Backgr.<br>Frequency | Sample<br>frequency | Fold<br>Enrichment | +/- | P value  |
|--------------------------------------------------------|----------------------|---------------------|--------------------|-----|----------|
| DNA conformation change                                | 134                  | 96                  | 4.4                | +   | 1.08E-28 |
| Cell cycle DNA replication                             | 23                   | 16                  | 4.27               | +   | 5.53E-03 |
| Meiotic chromosome segregation                         | 65                   | 44                  | 4.16               | +   | 3.08E-11 |
| Female meiotic division                                | 73                   | 47                  | 3.96               | +   | 2.36E-11 |
| DNA-dependent DNA replication                          | 57                   | 35                  | 3.77               | +   | 2.02E-07 |
| Nuclear chromosome segregation                         | 131                  | 79                  | 3.71               | +   | 9.90E-19 |
| Reciprocal meiotic recombination                       | 29                   | 17                  | 3.6                | +   | 2.49E-02 |
| Chromosome condensation                                | 47                   | 27                  | 3.53               | +   | 1.06E-04 |
| Reciprocal DNA recombination                           | 30                   | 17                  | 3.48               | +   | 3.81E-02 |
| DNA replication                                        | 80                   | 45                  | 3.46               | +   | 7.84E-09 |
| Chromosome segregation                                 | 151                  | 82                  | 3.34               | +   | 8.37E-17 |
| DNA-templated transcription, initiation                | 76                   | 41                  | 3.31               | +   | 2.43E-07 |
| Mitotic sister chromatid segregation                   | 72                   | 38                  | 3.24               | +   | 2.09E-06 |
| Sister chromatid segregation                           | 79                   | 39                  | 3.03               | +   | 7.74E-06 |
| Chromatin assembly or disassembly                      | 140                  | 69                  | 3.03               | +   | 8.59E-12 |
| Negative regulation of gene expression, epigenetic     | 56                   | 27                  | 2.96               | +   | 3.01E-03 |
| Chromatin silencing                                    | 55                   | 26                  | 2.9                | +   | 6.68E-03 |
| Regulation of chromatin organization                   | 72                   | 34                  | 2.9                | +   | 2.15E-04 |
| Regulation of chromatin modification                   | 68                   | 31                  | 2.8                | +   | 1.63E-03 |
| Negative regulation of organelle organization          | 75                   | 34                  | 2.79               | +   | 5.43E-04 |
| Negative regulation of protein modification process    | 83                   | 37                  | 2.74               | +   | 2.43E-04 |
| Centrosome duplication                                 | 84                   | 37                  | 2.71               | +   | 3.25E-04 |
| Regulation of chromosome organization                  | 102                  | 44                  | 2.65               | +   | 3.98E-05 |
| Centrosome cycle                                       | 98                   | 42                  | 2.63               | +   | 9.96E-05 |
| DNA recombination                                      | 61                   | 26                  | 2.62               | +   | 3.94E-02 |
| Meiosis I                                              | 73                   | 31                  | 2.61               | +   | 6.80E-03 |
| DNA metabolic process                                  | 243                  | 103                 | 2.6                | +   | 3.65E-14 |
| Microtubule organizing center organization             | 130                  | 54                  | 2.55               | +   | 3.55E-06 |
| Cellular macromolecular complex assembly               | 234                  | 95                  | 2.49               | +   | 8.64E-12 |
| Meiotic nuclear division                               | 180                  | 73                  | 2.49               | +   | 1.43E-08 |
| Meiotic cell cycle process                             | 186                  | 74                  | 2.44               | +   | 2.44E-08 |
| Meiotic cell cycle                                     | 186                  | 74                  | 2.44               | +   | 2.44E-08 |
| Centrosome organization                                | 126                  | 50                  | 2.44               | +   | 5.83E-05 |
| RNA biosynthetic process                               | 177                  | 68                  | 2.36               | +   | 7.01E-07 |
| Nuclear division                                       | 354                  | 135                 | 2.34               | +   | 1.90E-15 |
| Nucleic acid-templated transcription                   | 174                  | 66                  | 2.33               | +   | 2.10E-06 |
| Transcription, DNA-templated                           | 174                  | 66                  | 2.33               | +   | 2.10E-06 |
| Chromosome organization                                | 480                  | 182                 | 2.33               | +   | 1.97E-21 |
| Protein complex assembly                               | 280                  | 106                 | 2.33               | +   | 1.85E-11 |
| Negative regulation of cellular component organization | 128                  | 48                  | 2.3                | +   | 5.58E-04 |
| Protein complex biogenesis                             | 283                  | 106                 | 2.3                | +   | 3.60E-11 |
| Organelle fission                                      | 361                  | 135                 | 2.3                | +   | 9.01E-15 |
| Gene silencing                                         | 99                   | 37                  | 2.3                | +   | 1.40E-02 |
| DNA repair                                             | 127                  | 46                  | 2.23               | +   | 2.49E-03 |
| Chromatin organization                                 | 314                  | 113                 | 2.21               | +   | 6.43E-11 |
| Macromolecular complex assembly                        | 349                  | 124                 | 2.18               | +   | 8.39E-12 |
| Mitotic nuclear division                               | 207                  | 69                  | 2.05               | +   | 1.30E-04 |
| Nucleobase-containing compound biosynthetic process    | 321                  | 103                 | 1.97               | +   | 5.46E-07 |

| Term                                                                    | Backgr. Frequency | Sample frequency | Fold Enrichment | +/- | P value  |
|-------------------------------------------------------------------------|-------------------|------------------|-----------------|-----|----------|
| Regulation of mitotic cell cycle                                        | 221               | 70               | 1.95            | +   | 6.69E-04 |
| Cell cycle process                                                      | 674               | 213              | 1.94            | +   | 3.45E-16 |
| Cell cycle                                                              | 729               | 227              | 1.91            | +   | 1.07E-16 |
| Nucleic acid metabolic process                                          | 865               | 269              | 1.91            | +   | 2.63E-20 |
| Regulation of cell cycle process                                        | 201               | 62               | 1.9             | +   | 7.21E-03 |
| Regulation of cell cycle                                                | 350               | 104              | 1.83            | +   | 2.32E-05 |
| Heterocycle biosynthetic process                                        | 393               | 114              | 1.78            | +   | 1.62E-05 |
| Aromatic compound biosynthetic process                                  | 389               | 111              | 1.75            | +   | 5.91E-05 |
| Negative regulation of nucleobase-containing compound metabolic process | 309               | 88               | 1.75            | +   | 1.81E-03 |
| Regulation of organelle organization                                    | 284               | 80               | 1.73            | +   | 8.46E-03 |
| Mitotic cell cycle                                                      | 538               | 151              | 1.72            | +   | 5.05E-07 |
| Negative regulation of RNA biosynthetic process                         | 275               | 77               | 1.72            | +   | 1.58E-02 |
| Negative regulation of transcription, DNA-templated                     | 275               | 77               | 1.72            | +   | 1.58E-02 |
| Negative regulation of nucleic acid-templated transcription             | 275               | 77               | 1.72            | +   | 1.58E-02 |
| Microtubule cytoskeleton organization                                   | 405               | 113              | 1.71            | +   | 1.37E-04 |
| Negative regulation of gene expression                                  | 405               | 113              | 1.71            | +   | 1.37E-04 |
| Mitotic cell cycle process                                              | 484               | 135              | 1.71            | +   | 6.93E-06 |
| Negative regulation of macromolecule biosynthetic process               | 323               | 90               | 1.71            | +   | 3.26E-03 |
| Negative regulation of cellular macromolecule biosynthetic process      | 323               | 90               | 1.71            | +   | 3.26E-03 |
| Cellular response to DNA damage stimulus                                | 274               | 76               | 1.7             | +   | 2.48E-02 |
| Negative regulation of cellular biosynthetic process                    | 332               | 92               | 1.7             | +   | 3.11E-03 |
| Negative regulation of biosynthetic process                             | 332               | 92               | 1.7             | +   | 3.11E-03 |
| Protein complex subunit organization                                    | 580               | 160              | 1.7             | +   | 4.80E-07 |
| Negative regulation of RNA metabolic process                            | 288               | 79               | 1.69            | +   | 2.44E-02 |
| Organic cyclic compound biosynthetic process                            | 431               | 117              | 1.67            | +   | 3.20E-04 |
| Negative regulation of nitrogen compound metabolic process              | 354               | 96               | 1.67            | +   | 4.47E-03 |
| Nucleobase-containing compound metabolic process                        | 1149              | 309              | 1.65            | +   | 1.39E-14 |
| RNA metabolic process                                                   | 644               | 173              | 1.65            | +   | 6.03E-07 |
| Negative regulation of macromolecule metabolic process                  | 531               | 141              | 1.63            | +   | 5.90E-05 |
| Positive regulation of macromolecule biosynthetic process               | 328               | 87               | 1.63            | +   | 3.03E-02 |
| Regulation of cellular macromolecule biosynthetic process               | 941               | 246              | 1.61            | +   | 1.04E-09 |
| Regulation of macromolecule biosynthetic process                        | 943               | 246              | 1.6             | +   | 1.29E-09 |
| Macromolecular complex subunit organization                             | 866               | 224              | 1.59            | +   | 3.48E-08 |
| Heterocycle metabolic process                                           | 1240              | 320              | 1.59            | +   | 8.47E-13 |
| Negative regulation of metabolic process                                | 566               | 146              | 1.58            | +   | 1.83E-04 |
| Cellular aromatic compound metabolic process                            | 1273              | 326              | 1.57            | +   | 1.17E-12 |
| Regulation of biosynthetic process                                      | 997               | 255              | 1.57            | +   | 3.49E-09 |
| Regulation of cellular biosynthetic process                             | 996               | 254              | 1.57            | +   | 5.22E-09 |
| Regulation of RNA biosynthetic process                                  | 846               | 215              | 1.56            | +   | 4.21E-07 |
| Regulation of transcription, DNA-templated                              | 846               | 215              | 1.56            | +   | 4.21E-07 |
| Regulation of nucleic acid-templated transcription                      | 846               | 215              | 1.56            | +   | 4.21E-07 |
| Cellular component assembly                                             | 752               | 191              | 1.56            | +   | 5.04E-06 |

| Term                                                           | Backgr.<br>Frequency | Sample<br>frequency | Fold<br>Enrichment | +/- | P value  |
|----------------------------------------------------------------|----------------------|---------------------|--------------------|-----|----------|
| Regulation of cellular protein metabolic process               | 429                  | 108                 | 1.55               | +   | 2.59E-02 |
| Organic cyclic compound metabolic process                      | 1343                 | 335                 | 1.53               | +   | 1.41E-11 |
| Regulation of gene expression                                  | 1080                 | 268                 | 1.52               | +   | 2.02E-08 |
| Regulation of nucleobase-containing compound metabolic process | 974                  | 241                 | 1.52               | +   | 3.43E-07 |
| Regulation of protein metabolic process                        | 454                  | 112                 | 1.52               | +   | 4.16E-02 |
| Negative regulation of cellular metabolic process              | 485                  | 119                 | 1.51               | +   | 2.88E-02 |
| Regulation of nitrogen compound metabolic process              | 1079                 | 264                 | 1.5                | +   | 1.20E-07 |
| Positive regulation of macromolecule metabolic process         | 521                  | 127                 | 1.5                | +   | 1.98E-02 |
| Single-organism organelle organization                         | 1080                 | 263                 | 1.5                | +   | 2.07E-07 |
| Cellular component biogenesis                                  | 826                  | 201                 | 1.5                | +   | 4.65E-05 |
| Regulation of cellular component organization                  | 639                  | 155                 | 1.49               | +   | 2.58E-03 |
| Regulation of RNA metabolic process                            | 923                  | 222                 | 1.48               | +   | 1.98E-05 |
| Regulation of macromolecule metabolic process                  | 1423                 | 341                 | 1.47               | +   | 1.33E-09 |
| Macromolecule biosynthetic process                             | 708                  | 169                 | 1.47               | +   | 2.15E-03 |
| Cellular macromolecule biosynthetic process                    | 700                  | 167                 | 1.47               | +   | 2.58E-03 |
| Organelle organization                                         | 1539                 | 365                 | 1.46               | +   | 6.42E-10 |
| Regulation of primary metabolic process                        | 1378                 | 322                 | 1.44               | +   | 1.20E-07 |
| Regulation of cellular metabolic process                       | 1421                 | 326                 | 1.41               | +   | 6.69E-07 |
| Negative regulation of biological process                      | 1141                 | 258                 | 1.39               | +   | 2.19E-04 |
| Cellular nitrogen compound metabolic process                   | 1516                 | 342                 | 1.39               | +   | 1.43E-06 |
| Regulation of metabolic process                                | 1620                 | 362                 | 1.37               | +   | 1.18E-06 |
| Negative regulation of cellular process                        | 1011                 | 225                 | 1.37               | +   | 4.82E-03 |
| Cellular component organization                                | 2359                 | 520                 | 1.35               | +   | 3.67E-10 |
| Positive regulation of biological process                      | 1100                 | 242                 | 1.35               | +   | 4.34E-03 |
| Positive regulation of cellular process                        | 969                  | 212                 | 1.34               | +   | 2.84E-02 |
| Nervous system development                                     | 1550                 | 337                 | 1.34               | +   | 8.82E-05 |
| Cellular component organization or biogenesis                  | 2420                 | 526                 | 1.34               | +   | 2.57E-09 |
| Organic substance biosynthetic process                         | 1107                 | 239                 | 1.33               | +   | 1.84E-02 |
| Regulation of cellular process                                 | 2901                 | 626                 | 1.33               | +   | 2.06E-11 |
| Neurogenesis                                                   | 1398                 | 299                 | 1.31               | +   | 2.42E-03 |
| Cellular macromolecule metabolic process                       | 2233                 | 477                 | 1.31               | +   | 5.37E-07 |
| Regulation of biological process                               | 3154                 | 673                 | 1.31               | +   | 1.10E-11 |
| Nitrogen compound metabolic process                            | 1782                 | 379                 | 1.31               | +   | 1.07E-04 |
| Biological regulation                                          | 3431                 | 720                 | 1.29               | +   | 2.45E-11 |
| System development                                             | 2184                 | 457                 | 1.29               | +   | 2.09E-05 |
| Multicellular organismal development                           | 2737                 | 557                 | 1.25               | +   | 1.38E-05 |
| Cell differentiation                                           | 2207                 | 446                 | 1.24               | +   | 1.78E-03 |
| Single-organism cellular process                               | 4961                 | 1000                | 1.24               | +   | 9.04E-14 |
| Cellular developmental process                                 | 2276                 | 458                 | 1.24               | +   | 1.90E-03 |
| Anatomical structure development                               | 2973                 | 588                 | 1.22               | +   | 2.56E-04 |
| Cellular process                                               | 6231                 | 1227                | 1.21               | +   | 2.66E-16 |
| Developmental process                                          | 3281                 | 645                 | 1.21               | +   | 1.03E-04 |
| Single-organism developmental process                          | 3257                 | 639                 | 1.21               | +   | 1.68E-04 |
| Cellular metabolic process                                     | 3189                 | 625                 | 1.2                | +   | 2.97E-04 |
| Macromolecule metabolic process                                | 2815                 | 551                 | 1.2                | +   | 2.89E-03 |
| Single-organism process                                        | 6411                 | 1225                | 1.17               | +   | 2.10E-11 |
| Primary metabolic process                                      | 3500                 | 667                 | 1.17               | +   | 4.89E-03 |
| Single-multicellular organism process                          | 3282                 | 625                 | 1.17               | +   | 1.38E-02 |

| Term                                | Backgr.<br>Frequency | Sample<br>frequency | Fold<br>Enrichment | +/- | P value  |
|-------------------------------------|----------------------|---------------------|--------------------|-----|----------|
| Organic substance metabolic process | 3812                 | 710                 | 1.14               | +   | 4.27E-02 |
| Unclassified                        | 3044                 | 506                 | 1.02               | +   | 0.00E+00 |
| Translation                         | 290                  | 19                  | 0.4                | -   | 6.04E-03 |
| Amide biosynthetic process          | 309                  | 20                  | 0.4                | -   | 2.22E-03 |
| Peptide biosynthetic process        | 299                  | 19                  | 0.39               | -   | 2.40E-03 |
