# Supplementary material for: Slowed aging during reproductive dormancy is reflected in genome-wide transcriptome changes in Drosophila melanogaster
Source: PubMed Central journal article supplement (PMC4711038; doi:10.1186/s12864-016-2383-1), 2016-01-13
Supplement: 12864_2016_2383_MOESM11_ESM.pdf [file 12864_2016_2383_MOESM11_ESM.pdf]

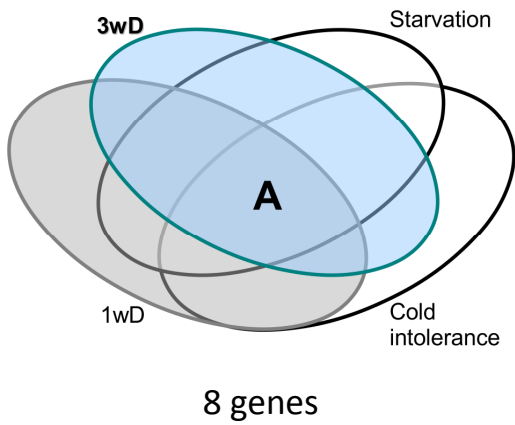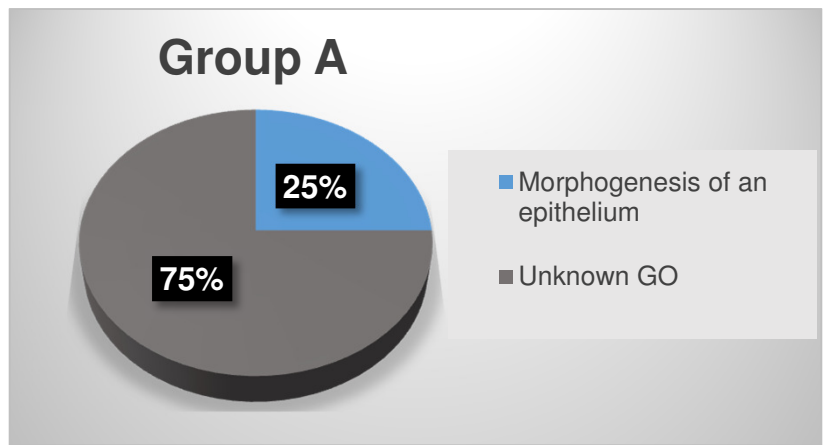

| Term                                        | Backgr. frequency | Sample frequency | Expected | +/- | P-value  |
|---------------------------------------------|-------------------|------------------|----------|-----|----------|
| Tube morphogenesis (GO:0035239)             | 123               | 2                | 7.22E-02 | +   | 2.20E-03 |
| Tube development (GO:0035295)               | 204               | 2                | 1.20E-01 | +   | 5.91E-03 |
| Embryonic morphogenesis (GO:0048598)        | 231               | 2                | 1.36E-01 | +   | 7.52E-03 |
| Morphogenesis of an epithelium (GO:0002009) | 285               | 2                | 1.67E-01 | +   | 1.13E-02 |
| Tissue morphogenesis (GO:0048729)           | 311               | 2                | 1.83E-01 | +   | 1.33E-02 |
| Embryo development (GO:0009790)             | 509               | 2                | 2.99E-01 | +   | 3.36E-02 |

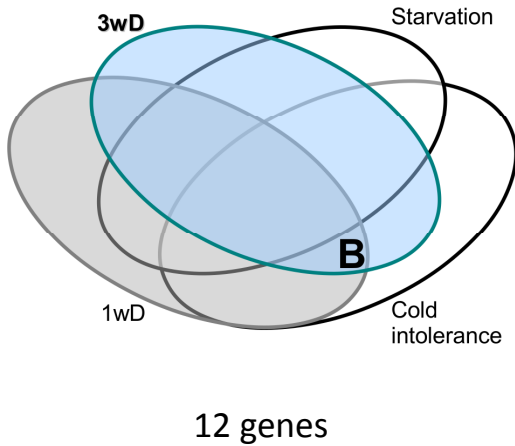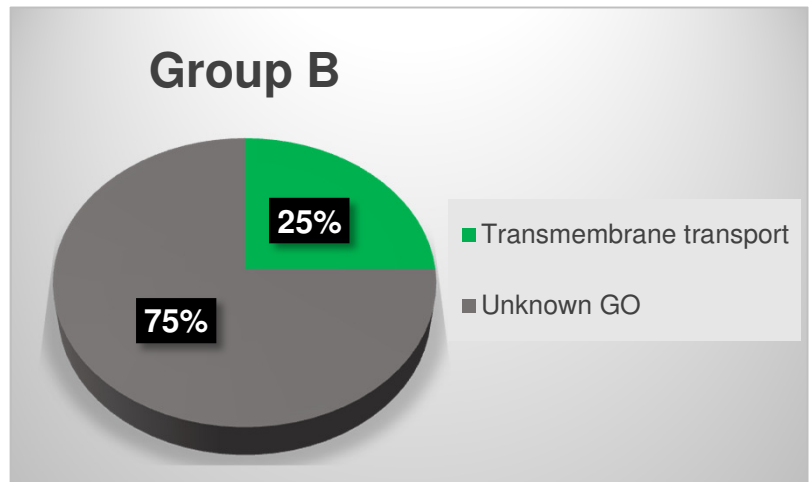

| Term                                 | Backgr. frequency | Sample frequency | Expected | +/- | P-value  |
|--------------------------------------|-------------------|------------------|----------|-----|----------|
| Transmembrane transport (GO:0055085) | 427               | 3                | 3.76E-01 | +   | 1.10E-02 |

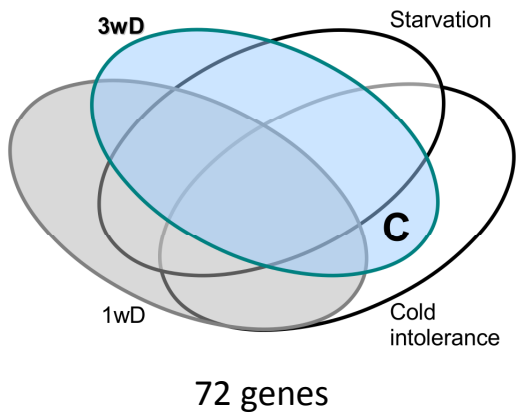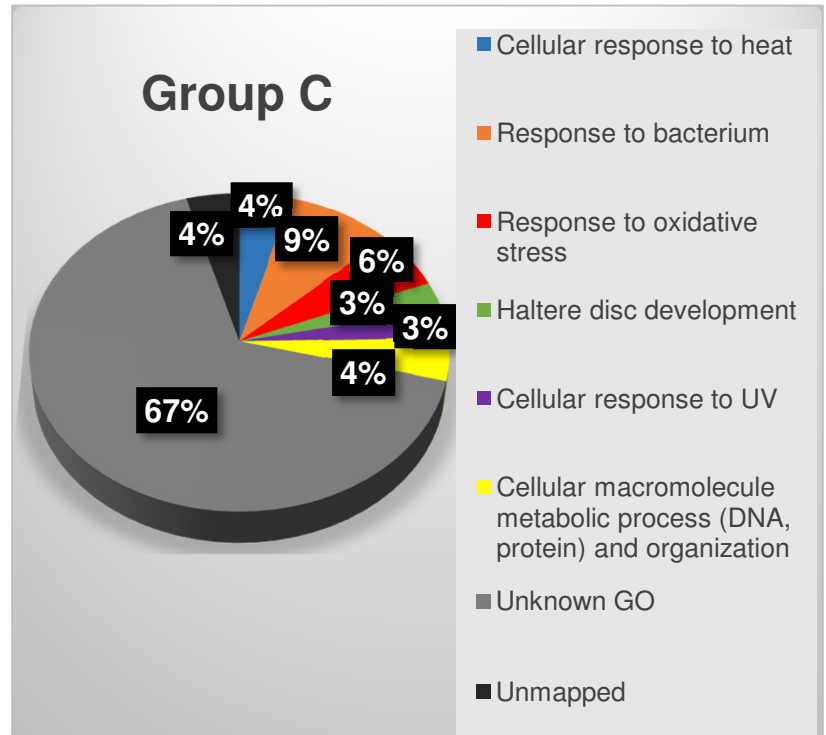

| Term                                                                                                                     | Backgr. frequency | Sample frequency | Expected | +/- | P-value  |
|--------------------------------------------------------------------------------------------------------------------------|-------------------|------------------|----------|-----|----------|
| Cellular response to heat (GO:0034605)                                                                                   | 23                | 3                | 1.17E-01 | +   | 4.64E-03 |
| Cellular macromolecule metabolic process (GO:0044260)                                                                    | 2232              | 2                | 1.13E+01 | -   | 9.10E-03 |
| Response to bacterium (GO:0009617)                                                                                       | 202               | 6                | 1.02E+00 | +   | 1.15E-02 |
| Response to oxidative stress (GO:0006979)                                                                                | 92                | 4                | 4.66E-01 | +   | 2.54E-02 |
| Haltere disc development (GO:0035216)                                                                                    | 11                | 2                | 5.57E-02 | +   | 2.95E-02 |
| Positive regulation of biosynthetic process of Antibacterial peptides active against Gram-negative bacteria (GO:0006964) | 11                | 2                | 5.57E-02 | +   | 2.95E-02 |
| Cellular component organization or biogenesis (GO:0071840)                                                               | 2286              | 3                | 1.16E+01 | -   | 3.38E-02 |
| Cellular response to UV (GO:0034644)                                                                                     | 13                | 2                | 6.58E-02 | +   | 4.09E-02 |
| Regulation of biosynthetic process of Antibacterial peptides active against Gram-negative bacteria (GO:0002813)          | 13                | 2                | 6.58E-02 | +   | 4.09E-02 |
| Cellular component organization (GO:0016043)                                                                             | 2229              | 3                | 1.13E+01 | -   | 4.40E-02 |

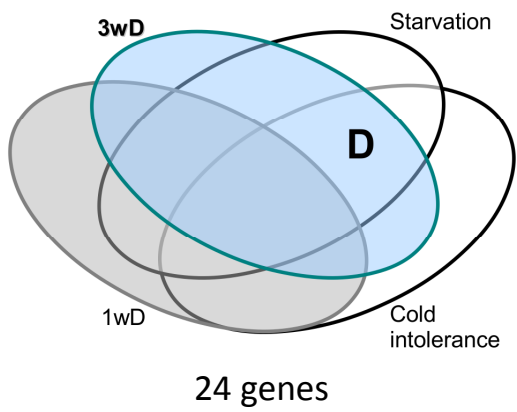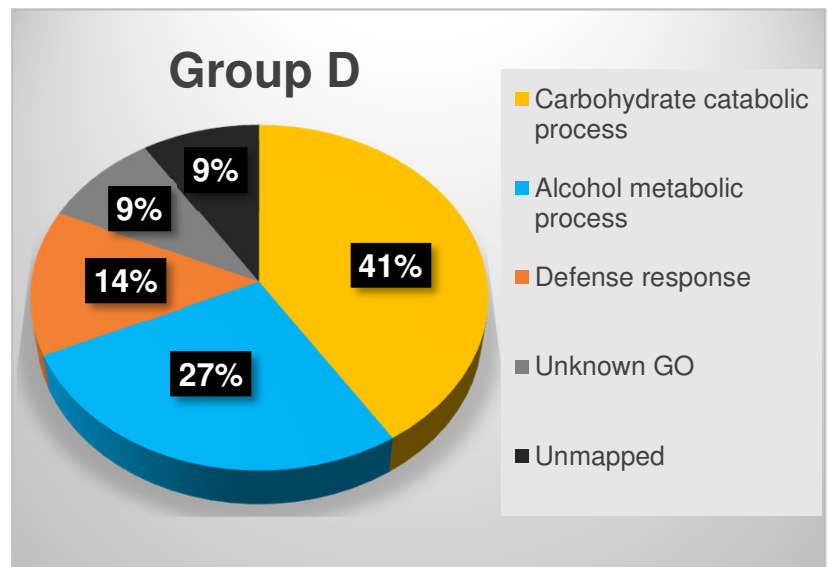

| Term                                                        | Backgr. frequency | Sample frequency | Expected | +/- | P-value  |
|-------------------------------------------------------------|-------------------|------------------|----------|-----|----------|
| Cellular carbohydrate catabolic process (GO:0044275)        | 4                 | 2                | 6.46E-03 | +   | 5.95E-05 |
| Alcohol metabolic process (GO:0006066)                      | 57                | 3                | 9.20E-02 | +   | 3.19E-04 |
| Organic hydroxy compound catabolic process (GO:1901616)     | 12                | 2                | 1.94E-02 | +   | 5.31E-04 |
| Alcohol catabolic process (GO:0046164)                      | 12                | 2                | 1.94E-02 | +   | 5.31E-04 |
| Small molecule catabolic process (GO:0044282)               | 73                | 3                | 1.18E-01 | +   | 6.59E-04 |
| Carbohydrate metabolic process (GO:0005975)                 | 273               | 4                | 4.41E-01 | +   | 2.65E-03 |
| Small molecule metabolic process (GO:0044281)               | 739               | 6                | 1.19E+00 | +   | 2.68E-03 |
| Single-organism catabolic process (GO:0044712)              | 286               | 4                | 4.62E-01 | +   | 3.15E-03 |
| Organic hydroxy compound metabolic process (GO:1901615)     | 131               | 3                | 2.12E-01 | +   | 3.58E-03 |
| Single-organism metabolic process (GO:0044710)              | 1859              | 9                | 3.00E+00 | +   | 4.53E-03 |
| Single-organism carbohydrate catabolic process (GO:0044724) | 38                | 2                | 6.14E-02 | +   | 5.20E-03 |
| Carbohydrate catabolic process (GO:0016052)                 | 41                | 2                | 6.62E-02 | +   | 6.03E-03 |
| Cellular carbohydrate metabolic process (GO:0044262)        | 42                | 2                | 6.78E-02 | +   | 6.32E-03 |
| Single-organism carbohydrate metabolic process (GO:0044723) | 181               | 3                | 2.92E-01 | +   | 8.97E-03 |
| Response to ethanol (GO:0045471)                            | 62                | 2                | 1.00E-01 | +   | 1.35E-02 |
| Oxidation-reduction process (GO:0055114)                    | 531               | 4                | 8.58E-01 | +   | 2.88E-02 |
| Response to alcohol (GO:0097305)                            | 98                | 2                | 1.58E-01 | +   | 3.26E-02 |
| Organic substance catabolic process (GO:1901575)            | 559               | 4                | 9.03E-01 | +   | 3.44E-02 |
| Defense response (GO:0006952)                               | 330               | 3                | 5.33E-01 | +   | 4.65E-02 |

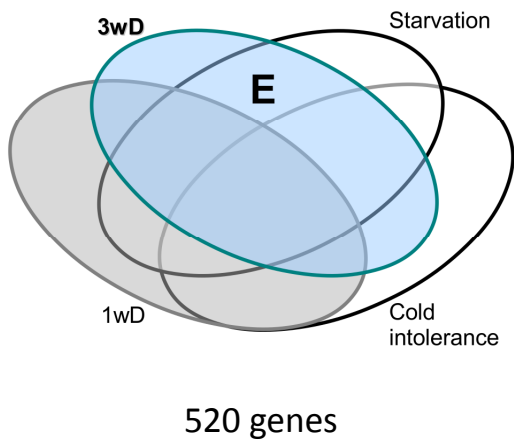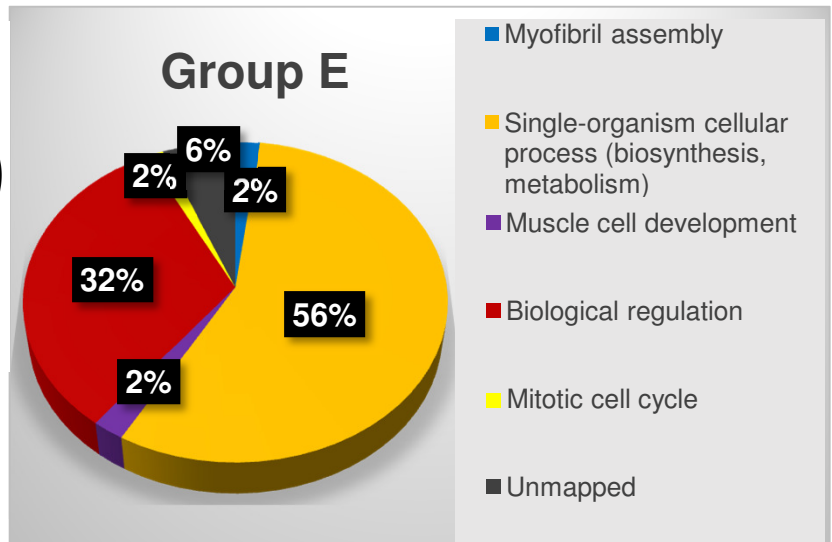

| Term                                               | Backgr. frequency | Sample frequency | Expected | +/- | P-value  |
|----------------------------------------------------|-------------------|------------------|----------|-----|----------|
| Myofibril assembly (GO:0030239)                    | 35                | 10               | 1.26E+00 | +   | 2.39E-04 |
| Single-organism process (GO:0044699)               | 6248              | 276              | 2.25E+02 | +   | 6.30E-04 |
| Single-organism cellular process (GO:0044763)      | 4790              | 220              | 1.72E+02 | +   | 1.60E-03 |
| Striated muscle cell development (GO:0055002)      | 46                | 10               | 1.65E+00 | +   | 2.59E-03 |
| Muscle cell development (GO:0055001)               | 46                | 10               | 1.65E+00 | +   | 2.59E-03 |
| Actomyosin structure organization (GO:0031032)     | 59                | 11               | 2.12E+00 | +   | 3.86E-03 |
| Biological regulation (GO:0065007)                 | 3256              | 157              | 1.17E+02 | +   | 7.63E-03 |
| Cellular process (GO:0009987)                      | 5996              | 260              | 2.16E+02 | +   | 1.03E-02 |
| Single-multicellular organism process (GO:0044707) | 3203              | 152              | 1.15E+02 | +   | 2.53E-02 |
| Single-organism biosynthetic process (GO:0044711)  | 483               | 35               | 1.74E+01 | +   | 2.72E-02 |
| Single-organism metabolic process (GO:0044710)     | 1859              | 97               | 6.69E+01 | +   | 3.00E-02 |
| Mitotic cell cycle, embryonic (GO:0045448)         | 29                | 7                | 1.04E+00 | +   | 3.04E-02 |

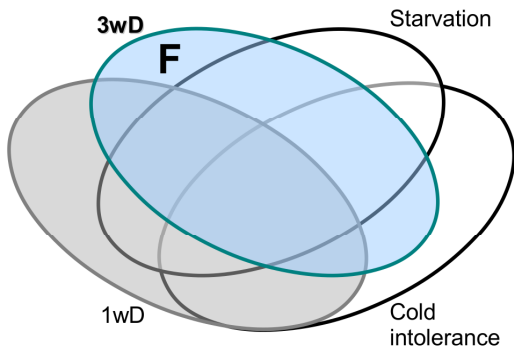

2279 genes

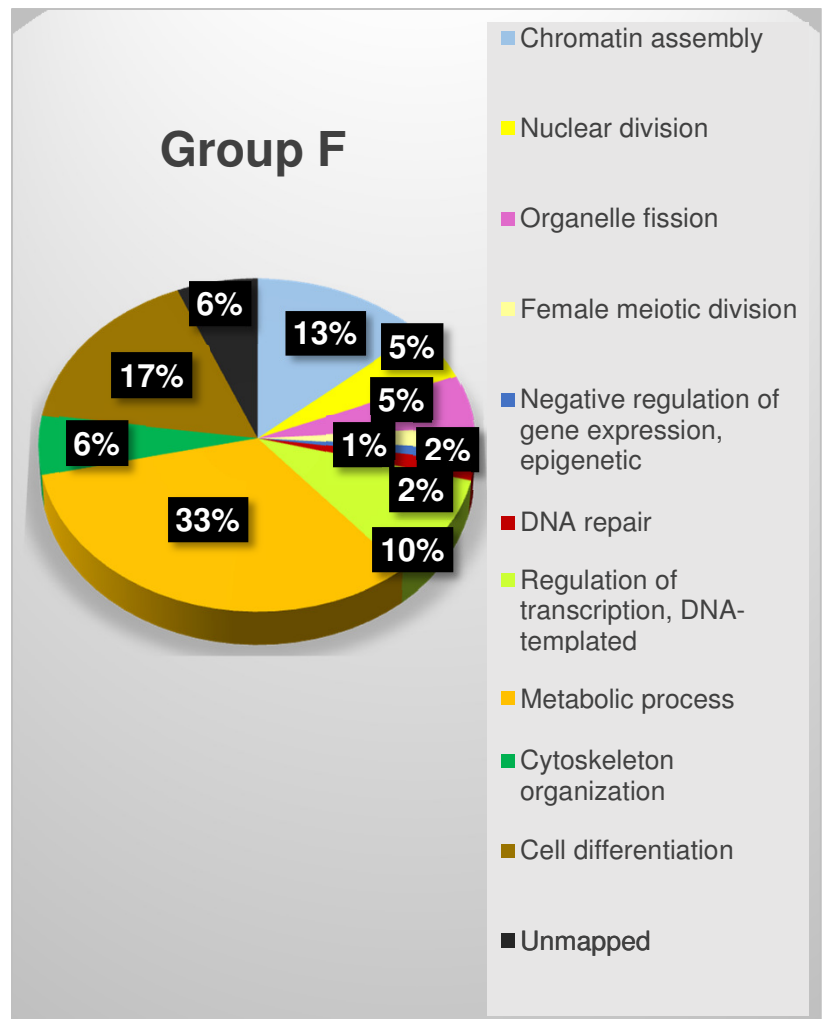

| Term                                                          | Backgr. frequency | Sample frequency | Expected | +/- | P-value  |
|---------------------------------------------------------------|-------------------|------------------|----------|-----|----------|
| DNA metabolic process (GO:0006259)                            | 333               | 168              | 5.39E+01 | +   | 6.95E-34 |
| DNA packaging (GO:0006323)                                    | 120               | 85               | 1.94E+01 | +   | 1.74E-25 |
| Nucleic acid metabolic process (GO:0090304)                   | 930               | 296              | 1.50E+02 | +   | 3.35E-25 |
| Nucleosome assembly (GO:0006334)                              | 67                | 62               | 1.08E+01 | +   | 5.51E-24 |
| DNA conformation change (GO:0071103)                          | 130               | 86               | 2.10E+01 | +   | 7.90E-24 |
| Protein-DNA complex assembly (GO:0065004)                     | 85                | 68               | 1.37E+01 | +   | 6.29E-23 |
| Chromatin assembly (GO:0031497)                               | 75                | 63               | 1.21E+01 | +   | 3.26E-22 |
| Nucleosome organization (GO:0034728)                          | 78                | 63               | 1.26E+01 | +   | 2.42E-21 |
| Protein-DNA complex subunit organization (GO:0071824)         | 102               | 71               | 1.65E+01 | +   | 1.31E-20 |
| Chromosome organization (GO:0051276)                          | 454               | 170              | 7.34E+01 | +   | 4.78E-20 |
| Nucleobase-containing compound metabolic process (GO:0006139) | 1225              | 337              | 1.98E+02 | +   | 1.24E-18 |
| Chromosome segregation (GO:0007059)                           | 143               | 81               | 2.31E+01 | +   | 2.86E-18 |
| Nuclear division (GO:0000280)                                 | 318               | 129              | 5.14E+01 | +   | 1.89E-17 |
| Cellular aromatic compound metabolic process (GO:0006725)     | 1353              | 358              | 2.19E+02 | +   | 2.56E-17 |
| Organelle fission (GO:0048285)                                | 323               | 129              | 5.22E+01 | +   | 6.56E-17 |
| Organic cyclic compound metabolic process (GO:1901360)        | 1421              | 370              | 2.30E+02 | +   | 6.59E-17 |

| Term                                                             | Backgr.<br>frequency | Sample<br>frequency | Expected | +/- | P-value  |
|------------------------------------------------------------------|----------------------|---------------------|----------|-----|----------|
| Cellular nitrogen compound metabolic process (GO:0034641)        | 1350                 | 355                 | 2.18E+02 | +   | 9.97E-17 |
| Heterocycle metabolic process (GO:0046483)                       | 1319                 | 347                 | 2.13E+02 | +   | 2.67E-16 |
| Female meiotic division (GO:0007143)                             | 70                   | 52                  | 1.13E+01 | +   | 7.60E-16 |
| Negative regulation of histone modification (GO:0031057)         | 5                    | 18                  | 8.09E-01 | +   | 1.37E-15 |
| Meiotic cell cycle process (GO:1903046)                          | 139                  | 72                  | 2.25E+01 | +   | 4.52E-14 |
| Meiotic nuclear division (GO:0007126)                            | 155                  | 76                  | 2.51E+01 | +   | 1.10E-13 |
| Negative regulation of chromatin modification (GO:1903309)       | 7                    | 18                  | 1.13E+00 | +   | 4.31E-13 |
| Meiotic cell cycle (GO:0051321)                                  | 174                  | 80                  | 2.81E+01 | +   | 5.57E-13 |
| Protein complex assembly (GO:0006461)                            | 264                  | 104                 | 4.27E+01 | +   | 6.44E-13 |
| Nitrogen compound metabolic process (GO:0006807)                 | 1625                 | 392                 | 2.63E+02 | +   | 7.03E-13 |
| Meiotic chromosome segregation (GO:0045132)                      | 61                   | 44                  | 9.86E+00 | +   | 9.68E-13 |
| Protein complex biogenesis (GO:0070271)                          | 266                  | 104                 | 4.30E+01 | +   | 1.04E-12 |
| Cell cycle process (GO:0022402)                                  | 617                  | 186                 | 9.98E+01 | +   | 1.29E-12 |
| Female meiosis chromosome segregation (GO:0016321)               | 33                   | 32                  | 5.34E+00 | +   | 3.20E-12 |
| Cell cycle (GO:0007049)                                          | 698                  | 202                 | 1.13E+02 | +   | 3.71E-12 |
| Cellular macromolecule metabolic process (GO:0044260)            | 2232                 | 502                 | 3.61E+02 | +   | 4.63E-12 |
| Cell division (GO:0051301)                                       | 469                  | 151                 | 7.58E+01 | +   | 4.66E-12 |
| Macromolecular complex assembly (GO:0065003)                     | 329                  | 118                 | 5.32E+01 | +   | 4.72E-12 |
| Chromatin organization (GO:0006325)                              | 307                  | 109                 | 4.96E+01 | +   | 9.84E-11 |
| Cellular process (GO:0009987)                                    | 5996                 | 1140                | 9.70E+02 | +   | 1.73E-10 |
| Cellular macromolecular complex assembly (GO:0034622)            | 221                  | 86                  | 3.57E+01 | +   | 3.98E-10 |
| Negative regulation of chromosome organization (GO:2001251)      | 24                   | 25                  | 3.88E+00 | +   | 6.88E-10 |
| Chromatin assembly or disassembly (GO:0006333)                   | 148                  | 66                  | 2.39E+01 | +   | 7.26E-10 |
| Organelle organization (GO:0006996)                              | 1440                 | 339                 | 2.33E+02 | +   | 2.09E-09 |
| Single-organism cellular process (GO:0044763)                    | 4790                 | 924                 | 7.75E+02 | +   | 2.39E-08 |
| Single-organism organelle organization (GO:1902589)              | 972                  | 241                 | 1.57E+02 | +   | 5.33E-08 |
| Regulation of chromosome organization (GO:0033044)               | 60                   | 36                  | 9.70E+00 | +   | 5.89E-08 |
| Negative regulation of protein modification process (GO:0031400) | 35                   | 27                  | 5.66E+00 | +   | 7.03E-08 |
| Regulation of histone modification (GO:0031056)                  | 23                   | 22                  | 3.72E+00 | +   | 7.79E-08 |
| Microtubule organizing center organization (GO:0031023)          | 126                  | 55                  | 2.04E+01 | +   | 1.22E-07 |
| Cellular component organization (GO:0016043)                     | 2229                 | 473                 | 3.60E+02 | +   | 2.22E-07 |
| Macromolecular complex subunit organization (GO:0043933)         | 821                  | 208                 | 1.33E+02 | +   | 2.23E-07 |

| Term                                                                      | Backgr.<br>frequency | Sample<br>frequency | Expected | +/- | P-value  |
|---------------------------------------------------------------------------|----------------------|---------------------|----------|-----|----------|
| Regulation of chromatin organization<br>(GO:1902275)                      | 32                   | 25                  | 5.17E+00 | +   | 2.69E-07 |
| Protein complex subunit organization<br>(GO:0071822)                      | 546                  | 151                 | 8.83E+01 | +   | 3.01E-07 |
| Sister chromatid segregation (GO:0000819)                                 | 74                   | 39                  | 1.20E+01 | +   | 3.79E-07 |
| Mitotic sister chromatid segregation<br>(GO:0000070)                      | 68                   | 37                  | 1.10E+01 | +   | 4.52E-07 |
| Macromolecule metabolic process (GO:0043170)                              | 2870                 | 583                 | 4.64E+02 | +   | 8.00E-07 |
| Centrosome organization (GO:0051297)                                      | 122                  | 52                  | 1.97E+01 | +   | 8.51E-07 |
| Cellular metabolic process (GO:0044237)                                   | 3194                 | 639                 | 5.17E+02 | +   | 9.56E-07 |
| Regulation of chromatin modification<br>(GO:1903308)                      | 29                   | 23                  | 4.69E+00 | +   | 1.03E-06 |
| Centrosome cycle (GO:0007098)                                             | 95                   | 44                  | 1.54E+01 | +   | 1.48E-06 |
| Biological regulation (GO:0065007)                                        | 3256                 | 648                 | 5.27E+02 | +   | 1.60E-06 |
| Regulation of biological process (GO:0050789)                             | 3001                 | 601                 | 4.85E+02 | +   | 3.47E-06 |
| Cellular component organization or biogenesis<br>(GO:0071840)             | 2286                 | 474                 | 3.70E+02 | +   | 4.60E-06 |
| Mitotic nuclear division (GO:0007067)                                     | 195                  | 68                  | 3.15E+01 | +   | 8.27E-06 |
| Regulation of cellular process (GO:0050794)                               | 2786                 | 559                 | 4.51E+02 | +   | 1.25E-05 |
| Centrosome duplication (GO:0051298)                                       | 81                   | 38                  | 1.31E+01 | +   | 1.33E-05 |
| Microtubule cytoskeleton organization<br>(GO:0000226)                     | 389                  | 111                 | 6.29E+01 | +   | 1.46E-05 |
| Single-organism process (GO:0044699)                                      | 6248                 | 1140                | 1.01E+03 | +   | 1.62E-05 |
| Negative regulation of gene expression,<br>epigenetic (GO:0045814)        | 53                   | 29                  | 8.57E+00 | +   | 2.85E-05 |
| Cellular component assembly (GO:0022607)                                  | 649                  | 163                 | 1.05E+02 | +   | 3.81E-05 |
| Chromatin silencing (GO:0006342)                                          | 52                   | 28                  | 8.41E+00 | +   | 6.75E-05 |
| Negative regulation of organelle organization<br>(GO:0010639)             | 62                   | 31                  | 1.00E+01 | +   | 7.03E-05 |
| Regulation of biosynthetic process (GO:0009889)                           | 939                  | 217                 | 1.52E+02 | +   | 1.23E-04 |
| Primary metabolic process (GO:0044238)                                    | 3604                 | 691                 | 5.83E+02 | +   | 1.45E-04 |
| Regulation of macromolecule metabolic process<br>(GO:0060255)             | 1293                 | 283                 | 2.09E+02 | +   | 1.54E-04 |
| Regulation of cellular biosynthetic process<br>(GO:0031326)               | 938                  | 216                 | 1.52E+02 | +   | 1.70E-04 |
| Regulation of macromolecule biosynthetic<br>process (GO:0010556)          | 888                  | 205                 | 1.44E+02 | +   | 3.01E-04 |
| Regulation of organelle organization<br>(GO:0033043)                      | 221                  | 69                  | 3.57E+01 | +   | 3.69E-04 |
| Regulation of cellular macromolecule biosynthetic<br>process (GO:2000112) | 887                  | 204                 | 1.43E+02 | +   | 4.16E-04 |
| DNA repair (GO:0006281)                                                   | 121                  | 45                  | 1.96E+01 | +   | 4.76E-04 |
| Mitotic cell cycle process (GO:1903047)                                   | 457                  | 119                 | 7.39E+01 | +   | 4.86E-04 |
| Meiosis I (GO:0007127)                                                    | 68                   | 31                  | 1.10E+01 | +   | 4.92E-04 |
| Mitotic cell cycle (GO:0000278)                                           | 510                  | 129                 | 8.25E+01 | +   | 7.14E-04 |
| Organic substance metabolic process<br>(GO:0071704)                       | 3872                 | 729                 | 6.26E+02 | +   | 8.57E-04 |

| Term                                                                        | Backgr. frequency | Sample frequency | Expected | +/- | P-value  |
|-----------------------------------------------------------------------------|-------------------|------------------|----------|-----|----------|
| Regulation of primary metabolic process (GO:0080090)                        | 1287              | 276              | 2.08E+02 | +   | 1.14E-03 |
| Regulation of RNA biosynthetic process (GO:2001141)                         | 802               | 183              | 1.30E+02 | +   | 2.68E-03 |
| Regulation of transcription, DNA-templated (GO:0006355)                     | 802               | 183              | 1.30E+02 | +   | 2.68E-03 |
| Regulation of nucleic acid-templated transcription (GO:1903506)             | 802               | 183              | 1.30E+02 | +   | 2.68E-03 |
| Regulation of metabolic process (GO:0019222)                                | 1535              | 318              | 2.48E+02 | +   | 3.01E-03 |
| Nervous system development (GO:0007399)                                     | 1491              | 310              | 2.41E+02 | +   | 3.07E-03 |
| Regulation of protein modification process (GO:0031399)                     | 143               | 48               | 2.31E+01 | +   | 3.24E-03 |
| Chromosome condensation (GO:0030261)                                        | 43                | 22               | 6.95E+00 | +   | 3.57E-03 |
| DNA replication (GO:0006260)                                                | 79                | 32               | 1.28E+01 | +   | 3.72E-03 |
| Cellular component biogenesis (GO:0044085)                                  | 718               | 166              | 1.16E+02 | +   | 3.87E-03 |
| Negative regulation of cellular component organization (GO:0051129)         | 112               | 40               | 1.81E+01 | +   | 5.06E-03 |
| Reciprocal meiotic recombination (GO:0007131)                               | 28                | 17               | 4.53E+00 | +   | 5.07E-03 |
| Reciprocal DNA recombination (GO:0035825)                                   | 28                | 17               | 4.53E+00 | +   | 5.07E-03 |
| Regulation of cellular metabolic process (GO:0031323)                       | 1395              | 290              | 2.26E+02 | +   | 6.74E-03 |
| Cytoskeleton organization (GO:0007010)                                      | 597               | 141              | 9.65E+01 | +   | 7.48E-03 |
| Regulation of gene expression (GO:0010468)                                  | 1134              | 242              | 1.83E+02 | +   | 7.73E-03 |
| System development (GO:0048731)                                             | 2140              | 421              | 3.46E+02 | +   | 9.81E-03 |
| Negative regulation of cellular protein metabolic process (GO:0032269)      | 129               | 43               | 2.09E+01 | +   | 1.19E-02 |
| Negative regulation of protein metabolic process (GO:0051248)               | 129               | 43               | 2.09E+01 | +   | 1.19E-02 |
| Spindle assembly (GO:0051225)                                               | 81                | 31               | 1.31E+01 | +   | 1.53E-02 |
| Metabolic process (GO:0008152)                                              | 4438              | 809              | 7.18E+02 | +   | 1.96E-02 |
| Gene silencing (GO:0016458)                                                 | 99                | 35               | 1.60E+01 | +   | 2.30E-02 |
| Regulation of nitrogen compound metabolic process (GO:0051171)              | 1019              | 217              | 1.65E+02 | +   | 2.65E-02 |
| Regulation of nucleobase-containing compound Metabolic process (GO:0019219) | 981               | 210              | 1.59E+02 | +   | 2.66E-02 |
| Regulation of RNA metabolic process (GO:0051252)                            | 873               | 190              | 1.41E+02 | +   | 2.66E-02 |
| Microtubule-based process (GO:0007017)                                      | 495               | 118              | 8.00E+01 | +   | 2.77E-02 |
| Regulation of cell cycle (GO:0051726)                                       | 325               | 84               | 5.26E+01 | +   | 2.85E-02 |
| Neurogenesis (GO:0022008)                                                   | 1340              | 275              | 2.17E+02 | +   | 2.93E-02 |
| Multicellular organismal development (GO:0007275)                           | 2687              | 511              | 4.35E+02 | +   | 3.00E-02 |
| Regulation of mitotic cell cycle (GO:0007346)                               | 212               | 60               | 3.43E+01 | +   | 3.46E-02 |
| DNA-dependent DNA replication (GO:0006261)                                  | 43                | 20               | 6.95E+00 | +   | 3.59E-02 |
| Generation of precursor metabolites and energy (GO:0006091)                 | 149               | 7                | 2.41E+01 | -   | 3.81E-02 |
| Cell differentiation (GO:0030154)                                           | 2124              | 412              | 3.44E+02 | +   | 4.34E-02 |
| Regulation of cellular component organization (GO:0051128)                  | 547               | 127              | 8.85E+01 | +   | 4.36E-02 |
| Regulation of cell cycle process (GO:0010564)                               | 191               | 55               | 3.09E+01 | +   | 4.59E-02 |



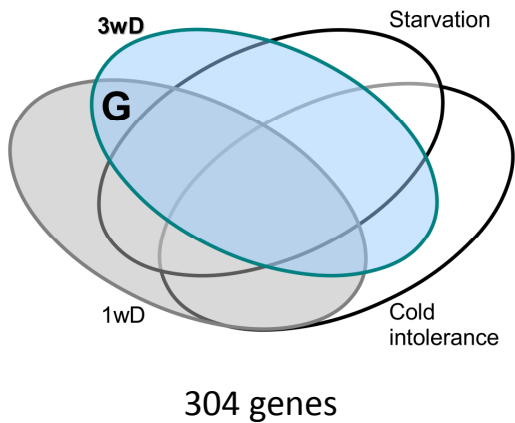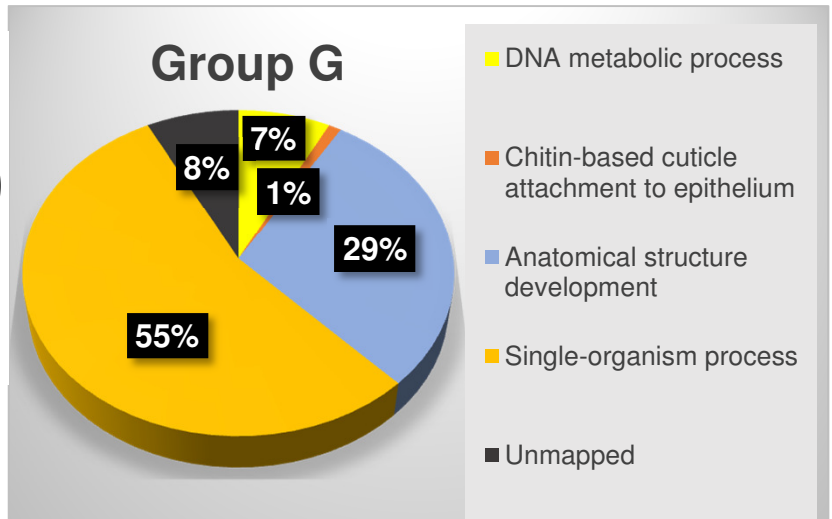

| Term                                                       | Backgr. frequency | Sample frequency | Expected | +/- | P-value  |
|------------------------------------------------------------|-------------------|------------------|----------|-----|----------|
| DNA replication (GO:0006260)                               | 79                | 14               | 1.64E+00 | +   | 2.88E-07 |
| DNA metabolic process (GO:0006259)                         | 333               | 22               | 6.89E+00 | +   | 3.61E-04 |
| DNA replication initiation (GO:0006270)                    | 14                | 5                | 2.90E-01 | +   | 1.97E-03 |
| Chitin-based cuticle attachment to epithelium (GO:0040005) | 3                 | 3                | 6.21E-02 | +   | 5.73E-03 |
| DNA-dependent DNA replication (GO:0006261)                 | 43                | 7                | 8.90E-01 | +   | 5.81E-03 |
| Cell cycle DNA replication (GO:0044786)                    | 24                | 5                | 4.97E-01 | +   | 2.47E-02 |
| Anatomical structure development (GO:0048856)              | 2856              | 85               | 5.91E+01 | +   | 2.77E-02 |
| Single-organism process (GO:0044699)                       | 6248              | 159              | 1.29E+02 | +   | 3.82E-02 |

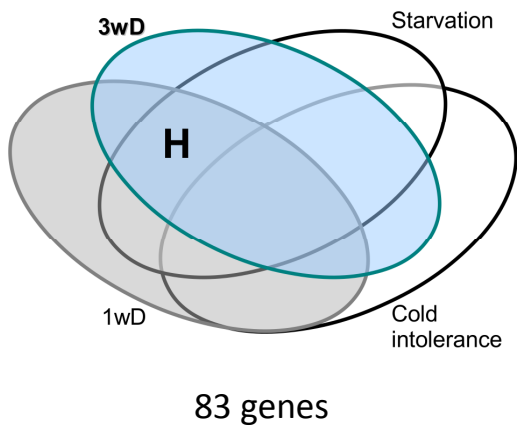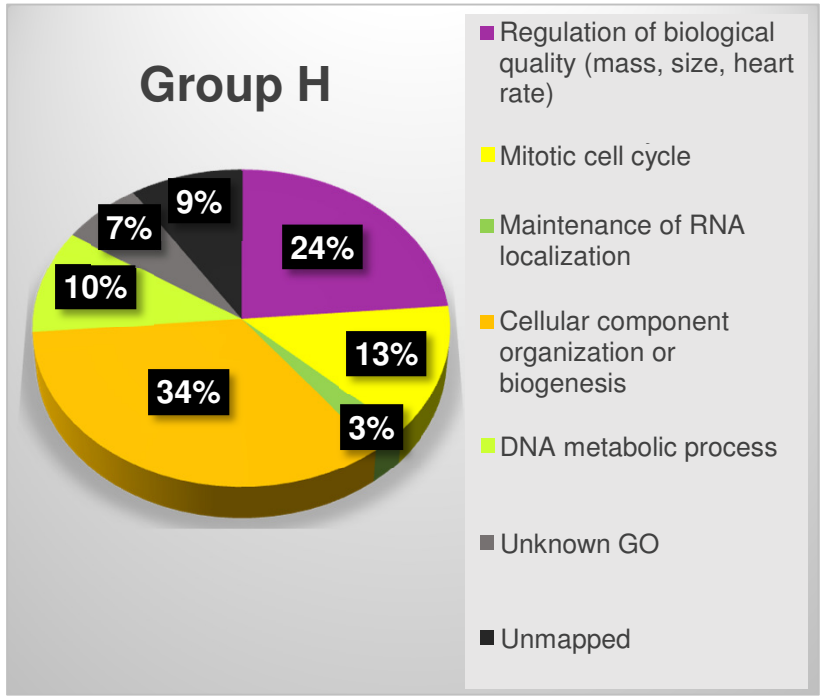

| Term                                                       | Backgr. frequency | Sample frequency | Expected | +/- | P-value  |
|------------------------------------------------------------|-------------------|------------------|----------|-----|----------|
| Regulation of biological quality (GO:0065008)              | 906               | 18               | 5.05E+00 | +   | 7.24E-05 |
| Regulation of mitosis (GO:0007088)                         | 66                | 5                | 3.68E-01 | +   | 1.41E-03 |
| Regulation of nuclear division (GO:0051783)                | 70                | 5                | 3.91E-01 | +   | 1.86E-03 |
| Regulation of cell division (GO:0051302)                   | 84                | 5                | 4.69E-01 | +   | 4.35E-03 |
| Maintenance of pole plasm mRNA location (GO:0046594)       | 3                 | 2                | 1.67E-02 | +   | 5.20E-03 |
| Cellular component organization or biogenesis (GO:0071840) | 2286              | 26               | 1.28E+01 | +   | 6.57E-03 |
| Regulation of mitotic cell cycle (GO:0007346)              | 212               | 7                | 1.18E+00 | +   | 7.18E-03 |
| Mitotic cell cycle process (GO:1903047)                    | 457               | 10               | 2.55E+00 | +   | 8.64E-03 |
| maintenance of RNA location (GO:0051237)                   | 4                 | 2                | 2.23E-02 | +   | 9.20E-03 |
| Pole cell development (GO:0007277)                         | 27                | 3                | 1.51E-01 | +   | 1.87E-02 |
| Mitotic cell cycle (GO:0000278)                            | 510               | 10               | 2.85E+00 | +   | 2.04E-02 |
| DNA metabolic process (GO:0006259)                         | 333               | 8                | 1.86E+00 | +   | 2.08E-02 |
| Cell cycle process (GO:0022402)                            | 617               | 11               | 3.44E+00 | +   | 2.34E-02 |
| Regulation of cell cycle process (GO:0010564)              | 191               | 6                | 1.07E+00 | +   | 2.73E-02 |
| Cellular component organization (GO:0016043)               | 2229              | 24               | 1.24E+01 | +   | 2.95E-02 |
| Mitotic nuclear division (GO:0007067)                      | 195               | 6                | 1.09E+00 | +   | 3.04E-02 |
| Regulation of cellular component organization (GO:0051128) | 547               | 10               | 3.05E+00 | +   | 3.49E-02 |
