# Supplementary material for: Slowed aging during reproductive dormancy is reflected in genome-wide transcriptome changes in Drosophila melanogaster
Source: PubMed Central journal article supplement (PMC4711038; doi:10.1186/s12864-016-2383-1), 2016-01-13
Supplement: 12864_2016_2383_MOESM15_ESM.pdf [file 12864_2016_2383_MOESM15_ESM.pdf]

**Additional file 15: Table S5.** Primers used for quantitative real-time PCR

| <b>Target</b>                       | <b>Forward primer</b>   | <b>Reverse primer</b>    |
|-------------------------------------|-------------------------|--------------------------|
| CG16756                             | TCGAATTGGATTTGTTTGCTAGA | CCGACTCCCTAAATTTTCGT     |
| Fatty Acid Desaturase 2             | TACCACCATGTCTTCCCTG     | GCTTGACCAAATCCAGTGAG     |
| Heat shock gene 67Bc                | GCAGCTGAGATTGTGGATTC    | TCTTTGTGTATCTGGCGGAA     |
| Larval Serum Protein 1 gamma        | GATTACACCTACTCCTCGGG    | TAGGCACAAAGAAGTCGGAT     |
| Necrotic                            | TCCTATGCCAAGTTCGTACC    | CCACGTGACCTATGAACAGA     |
| Neuropeptide receptor F             | AGTTAAGACACACGCGACTA    | TGGGGGCTCATTCAATTA       |
| Odorant Binding Protein 19b         | GTATAACGAGGACAAGACGGT   | TCCTTGATCTCGGGAATCTTG    |
| Period                              | TGCAAGCCGAGGATAATGTA    | CTTAGGGCTGAGAAGGGTG      |
| Actin 88F                           | AGGGTGTGATGGTGGGTATG    | CTTCTCCATGTCGTCCAGT      |
| Timeless, all isoforms              | ACATAACACAGTTTGCCACG    | TCATGGTGAAGATGCAGTCA     |
| Timeless, all isoforms except N & O | TCCATGAAGTCCTCGTTCG     | CATCGCTCACATACATTCTGG    |
| Timeless, isoforms N & O            | TGACGGAAATGACCAAGGAA    | TGGTCCACAAATGTAAAAATGTTA |
| Vitelline membrane 32E              | CGCCTACACAGAACAGGT      | TGTTGACCCTGGATTCTTG      |
